# Supplementary material for: Population-level emergence of bedaquiline and clofazimine resistance-associated variants among patients with drug-resistant tuberculosis in southern Africa: a phenotypic and phylogenetic analysis
Source: PubMed Central journal article supplement (PMC7416634; doi:10.1016/s2666-5247(20)30031-8), 2020-08
Supplement: mmc1.pdf [file mmc1.pdf]

# THE LANCET Microbe

## Supplementary appendix

This appendix formed part of the original submission and has been peer reviewed. We post it as supplied by the authors.

Supplement to: Nimmo C, Millard J, van Dorp L, et al. Population-level emergence of bedaquiline and clofazimine resistance-associated variants among patients with drug-resistant tuberculosis in southern Africa: a phenotypic and phylogenetic analysis. *Lancet Microbe* 2020; **1**: e165–74.

|                                    |           |
|------------------------------------|-----------|
| <b>RESEARCH IN CONTEXT .....</b>   | <b>2</b>  |
| <b>SUPPLEMENTARY METHODS.....</b>  | <b>3</b>  |
| <b>SUPPLEMENTARY FIGURES.....</b>  | <b>4</b>  |
| <b>SUPPLEMENTARY TABLES.....</b>   | <b>7</b>  |
| <b>ADDITIONAL REFERENCES .....</b> | <b>31</b> |

## Research in Context

The following studies were identified during a search of PubMed and Google Scholar for articles reporting clinical data in English published since 2000 using the terms “bedaquiline resistance” and “clofazimine resistance” in combination with country names for the Southern African Development Community conducted on 13<sup>th</sup> May 2020. Studies reporting only *in vitro* results and review articles were excluded.

Dheda K, Limberis JD, Pietersen E, Phelan J, Esmail A, Lesosky M, et al. Outcomes, infectiousness, and transmission dynamics of patients with extensively drug-resistant tuberculosis and home-discharged patients with programmatically incurable tuberculosis: a prospective cohort study. *Lancet Respir Med.* 2017 Apr;5(4):269-281.

Makhado NA, Matabane E, Faccin M, Pinçon C, Jouet A, Boutachkourt F, et al. Outbreak of multidrug-resistant tuberculosis in South Africa undetected by WHO-endorsed commercial tests: an observational study. *Lancet Infect Dis.* 2018;18(12):1350–9.

de Vos M, Ley SD, Wiggins KB, Derendinger B, Dippenaar A, Grobbelaar M, et al. Bedaquiline Microheteroresistance after Cessation of Tuberculosis Treatment. *N Engl J Med.* 2019 May 30;380(22):2178-2180.

Klopper M, Heupink TH, Hill-Cawthorne G, Streicher EM, Dippenaar A, De Vos M, et al. A landscape of genomic alterations at the root of a near-untreatable tuberculosis epidemic. *BMC Med.* 2020;18(1).

## Supplementary Methods

### Whole genome sequencing bioinformatics pipeline

Adapters were removed using Trim Galore v0.3.7. Reads were mapped to H37Rv (NC\_000962.3) with BMap v38.32 specifying a 98% identity threshold, de-duplicated with Picard Tools v2.20 and then mean genome coverage measured with Qualimap v2.21. FreeBayes v1.2 was used to call variants with supported by  $\geq 4$  reads, including  $\geq 1$  on each strand, with mapping quality  $\geq 20$  and base quality  $\geq 30$ . Functional consequences of the identified variants were annotated with snpEff.

### Additional studies included in phylogenies

A selection of additional whole genome sequences from studies in southern Africa were included to provide phylogenetic context. Where isolates with *Rv0678* resistance-associated variants had been identified by BIGSI or PYGSI from a published study, other whole genome sequences from that study were also included.

Additional lineage 2 genomes from southern Africa were identified by screening the National Center for Biotechnology Information (NCBI) Sequencing Read Archive with BIGSI for *Mycobacterium tuberculosis* whole genome sequences collected from Southern African Development Community countries with the phylogenetically definitive nucleotide change in *rpsA* 636 A→C.(1)

Additional lineage 4 genomes from Southern African Development Community countries were included from a comprehensive global study of lineage 4.(2)

## Supplementary Figures

**Supplementary Figure 1.** Correlation between bedaquiline and clofazimine MICs in isolates with a wild-type (red squares) and mutated (blue circles) *Rv0678* genes.

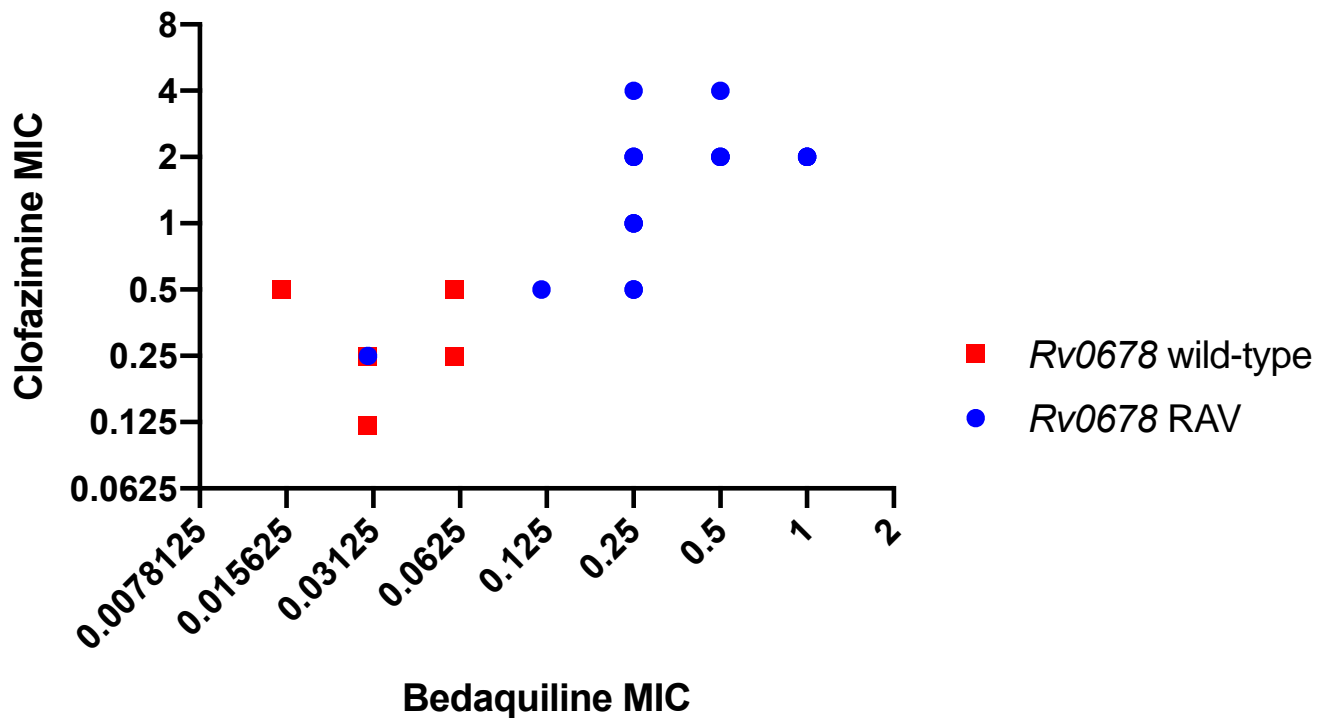

**Supplementary Figure 2 (page 5).** Linear phylogenetic tree of lineage 2 sequences, indicating study identification number (format XX\_X0000X) for samples sequenced for this study, or NCBI Sequencing Read Archive / European Nucleotide Archive accession number for publicly available samples (starting SRR/ERR). Annotations indicate resistance-associated variants and previously observed resistance profile associated with the variant.

**Supplementary Figure 3 (page 6).** Linear phylogenetic tree of lineage 4 sequences, indicating study identification number (format XX\_X0000X) for samples sequenced for this study, or NCBI Sequencing Read Archive / European Nucleotide Archive accession number for publicly available samples (starting SRR/ERR). Annotations indicate resistance-associated variants and previously observed resistance profile associated with the variant.

# Supplementary Figure 2

## LINEAGE 2

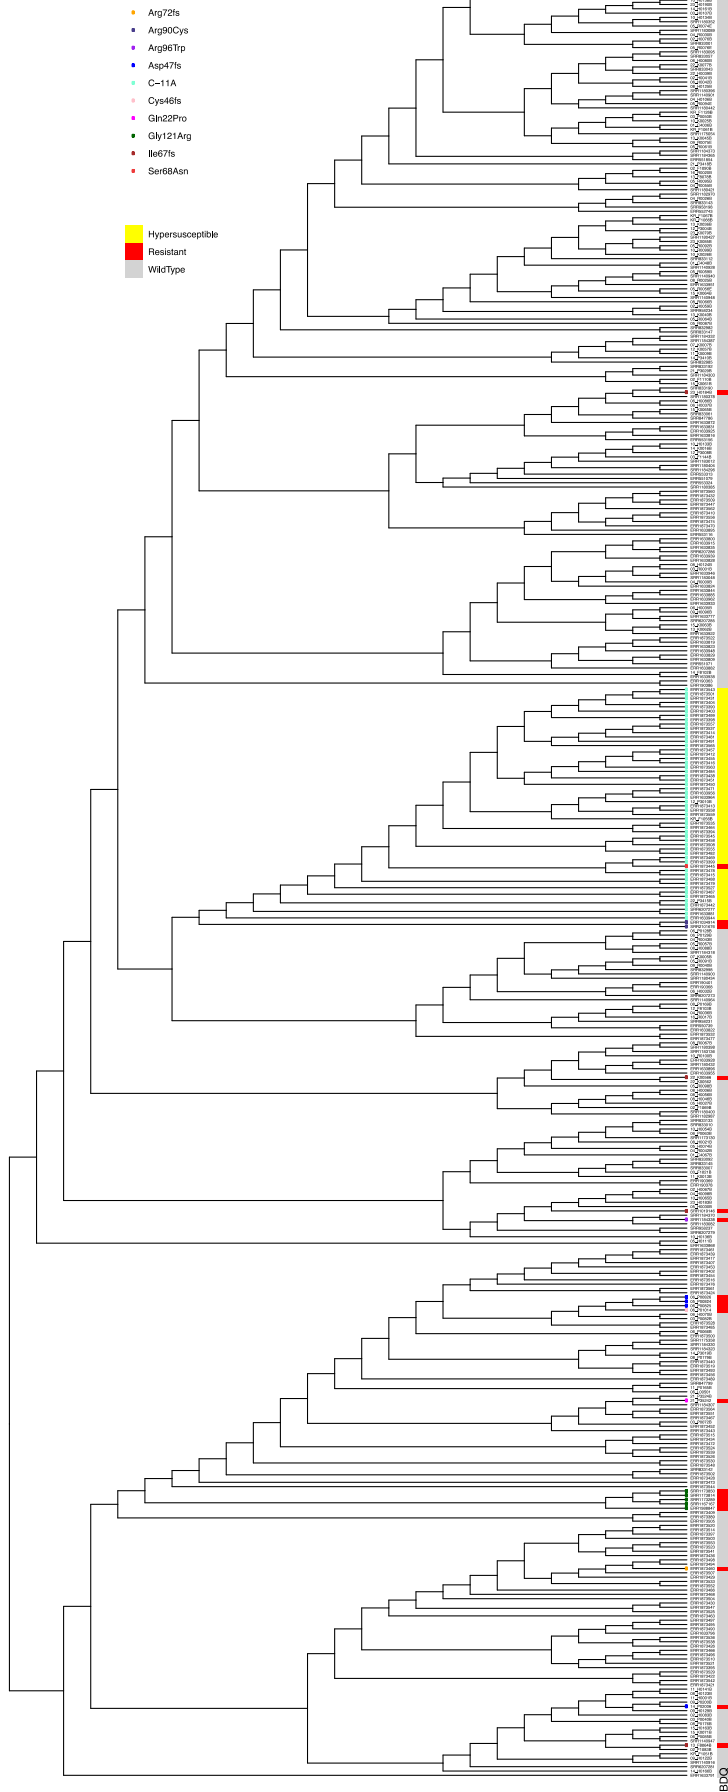

# Supplementary Figure 3

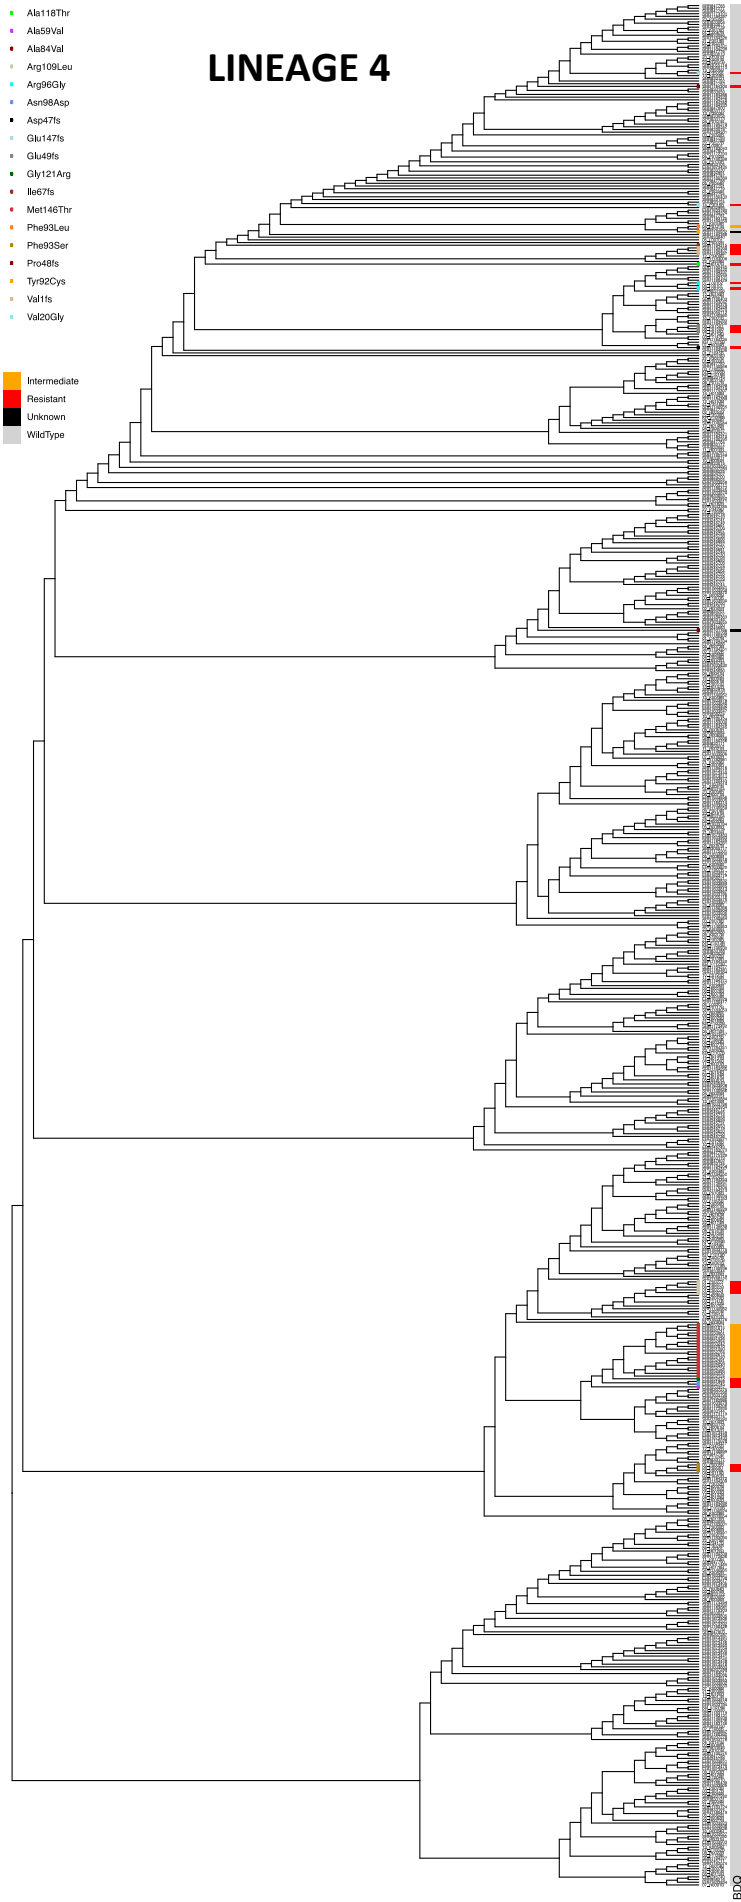

## Supplementary Tables

**Supplementary Table 1.** Previously observed bedaquiline resistance associated with *Rv0678* variants included in the extended datasets used for phylogenetic reconstruction. int = associated with intermediate MIC, comb = only seen in combination with other *Rv0678* variants.

| Observed resistance | Variant                                                                                                 | Associated with MIC                                                                                                          |             |
|---------------------|---------------------------------------------------------------------------------------------------------|------------------------------------------------------------------------------------------------------------------------------|-------------|
|                     |                                                                                                         | Resistant / intermediate                                                                                                     | Susceptible |
| Resistant           | Val1Ala                                                                                                 | Somoskovi (3), this study                                                                                                    |             |
|                     | Gln22Pro                                                                                                | This study                                                                                                                   |             |
|                     | Ala59Val                                                                                                | Villellas (4)                                                                                                                |             |
|                     | Arg90Cys                                                                                                | Yang (5)                                                                                                                     |             |
|                     | Arg94Gln                                                                                                | Andries (6)                                                                                                                  |             |
|                     | Asn98Asp                                                                                                | Yang (5)                                                                                                                     |             |
|                     | Ala118Thr                                                                                               | This study                                                                                                                   |             |
|                     | Leu136Arg                                                                                               | This study                                                                                                                   |             |
|                     | Met146Thr                                                                                               | Xu (7)                                                                                                                       | Yang (5)    |
|                     | <i>Frameshift variants</i><br>Val1fs<br>Cys46fs<br>Asp47fs<br>Pro48fs<br>Glu49fs<br>Ile67fs<br>Arg156fs | This study<br>This study, Andres (8)<br>Andres (8)<br>Andres (8)<br>This study (int), Andres (8)<br>This study<br>This study |             |
| Intermediate        | Val20Gly                                                                                                | This study, Ghodousi (9)                                                                                                     |             |
|                     | Phe93Ser                                                                                                | This study                                                                                                                   |             |
|                     | Arg109Leu                                                                                               | This study                                                                                                                   |             |
|                     | Gly121Arg                                                                                               | This study                                                                                                                   |             |
|                     | <i>Frameshift variants</i><br>Glu147fs                                                                  | This study                                                                                                                   |             |
| Susceptible         | Phe93Leu                                                                                                |                                                                                                                              | This study  |
| Hypersusceptible    | C-11A                                                                                                   |                                                                                                                              | Andries (6) |
| Unknown             | Ala62Thr                                                                                                |                                                                                                                              |             |
|                     | Ser68Asn                                                                                                |                                                                                                                              |             |
|                     | Ala84Val                                                                                                |                                                                                                                              |             |
|                     | Tyr92Cys                                                                                                |                                                                                                                              |             |
|                     | Arg96Gly                                                                                                |                                                                                                                              |             |
|                     | Arg96Thr                                                                                                |                                                                                                                              |             |
|                     | <i>Frameshift variants</i><br>Arg72fs                                                                   |                                                                                                                              |             |



**Supplementary Table 2.** Isolates from our centre with *Rv0678* variants, and preceding isolates from the same patient if available. Patients previously reported in Nimmo et al (10) are denoted with the corresponding patient identifier in brackets. All variants in *Rv0678* and *Rv1979c* are shown. No resistance-associated variants were found in *pepQ* or *atpE*. Drug resistance classification was determined by phenotypic testing. Bedaquiline and clofazimine MICs are shown where tested. Patients are referred to by five-character study identifiers. \*There was discordance with the same sample tested separately at a critical concentration of 0.25µg/mL appearing phenotypically resistant.

| Study ID (Key to Nimmo et al) (10) | Time-point | Sequencing ID | Rv0678 variant (frequency)            | Variants in Rv1979c       | Drug resistance classification (phenotypic DST) | Bedaquiline MIC | Clofazimine MIC |
|------------------------------------|------------|---------------|---------------------------------------|---------------------------|-------------------------------------------------|-----------------|-----------------|
| P0027 (A)                          | Baseline   | 06_P0027B     | Arg109Leu (67.9%)<br>Arg156fs (25.8%) |                           | Pre-XDR (F)                                     | 0.25            | 1.0             |
|                                    | Month 1    | 01_P00271     | Arg109Leu (86.8%)<br>Arg156fs 16.5%)  |                           |                                                 |                 |                 |
|                                    | Month 3    | 01_P00273     | Arg109Leu (86.7%)<br>Arg156fs (9.5%)  |                           |                                                 |                 |                 |
|                                    | Month 4    | 01_P00274     | Arg109Leu (29.1%)<br>Arg156fs (69.6%) |                           |                                                 |                 |                 |
|                                    | Month 5    | 07_P00275     | Arg109Leu (27.8%)<br>Arg156fs (69.2%) |                           |                                                 |                 |                 |
|                                    | Month 6    | 04_P00276     | Arg109Leu (23.9%)<br>Arg156fs (57.1%) |                           | Pre-XDR (F)                                     | 0.25            | 2.0             |
| P0150 (B)                          | Baseline   | 08_P0150B     | Glu49fs (72.0%)                       | Rv1979c Glu38Asp (100.0%) | Pre-XDR (F)                                     | 0.03            | 0.25            |
|                                    | Month 1    | 08_P01501     | Glu49fs (94.2%)                       | Rv1979c Glu38Asp (100.0%) |                                                 |                 |                 |
|                                    | Month 2    | 08_P01502     | Glu49fs (96.7%)                       | Rv1979c Glu38Asp (100.0%) |                                                 | 0.25            | 2.0             |
| P3016 (C)                          | Baseline   | 14_P3016B     | Val20Gly (100.0%)                     | Rv1979c Glu38Asp (100.0%) | Pre-XDR (SLI)                                   | 0.25            | 4.0             |
| P0005 (D)                          | Baseline   | 03_P0005B     | Phe93Ser (100.0%)                     |                           | Pre-XDR (F)                                     | 0.25            | 1.0             |
|                                    | Month 1    | 09_P00051     | Phe93Ser (100.0%)                     |                           |                                                 |                 |                 |
|                                    | Month 5    | 06_P00055     | Phe93Ser (100.0%)                     |                           |                                                 |                 |                 |
|                                    | Month 6    | 03_P00056     | Phe93Ser (100.0%)                     |                           |                                                 | 0.25            | 1.0             |
| P0121 (E)                          | Baseline   | 04_P0121B     | Phe93Leu (100.0%)                     | Rv1979c Glu38Asp (100.0%) | XDR                                             | 0.12            | Failed x3       |

|           |          |           |                                                                                                                                                          |                            |                           |       |      |
|-----------|----------|-----------|----------------------------------------------------------------------------------------------------------------------------------------------------------|----------------------------|---------------------------|-------|------|
| P0082 (F) | Baseline | 03_P0082B | Wild type                                                                                                                                                | Rv1979c Arg409Gln (100.0%) | XDR                       | 0.06  | 0.25 |
|           | Month 4  | 05_P00824 | Asp47fs (93.4%)                                                                                                                                          | Rv1979c Arg409Gln (100.0%) |                           | 0.5   | 2.0  |
|           | Month 5  | 06_P00825 | Cys46fs (35.9%)<br>Asp47fs (53.3%)                                                                                                                       | Rv1979c Arg409Gln (100.0%) |                           | 1.0   | 2.0  |
|           | Month 6  | 06_P00826 | Cys46fs (23.1%)<br>Asp47fs (69.8%)                                                                                                                       | Rv1979c Arg409Gln (100.0%) | XDR                       | 1.0   | 2.0  |
| P0101 (G) | Baseline | 04_P0101B | Wild type                                                                                                                                                | Rv1979c Glu38Asp (100.0%)  | XDR                       | 0.03  | 0.12 |
|           | Month 4  | 06_P01014 | Cys46fs (97.7%)                                                                                                                                          | Rv1979c Arg409Gln (100.0%) |                           | 1.0   | 2.0  |
| P0200 (H) | Baseline | 09_P0200B | Wild type                                                                                                                                                | Rv1979c Arg409Gln (100.0%) | XDR                       | 0.06  | 0.25 |
|           | Month 6  | 14_P02006 | Asp47fs (92.3%)                                                                                                                                          | Rv1979c Arg409Gln (100.0%) | XDR                       | 0.5   | 2.0  |
| P3505 (I) | Baseline | 13_P3505B | Wild type                                                                                                                                                | Rv1979c Glu38Asp (100.0%)  | XDR                       | 0.03  | 0.25 |
|           | Month 6  | 25_P35056 | Glu147fs (100.0%)                                                                                                                                        | Rv1979c Glu38Asp (100.0%)  |                           | 0.25  | 0.5  |
| P3524 (J) | Baseline | 21_P3524B | Wild type                                                                                                                                                | Rv1979c Arg409Gln (100.0%) | XDR                       | <0.03 | 0.25 |
|           | Month 2  | 21_P35242 | Gln22Pro (85.1%)<br>Asp47fs (12.6%)                                                                                                                      | Rv1979c Arg409Gln (100.0%) |                           | 1.0   | 2.0  |
|           | Month 6  | 25_P35246 | Glu22Pro (9.8%)<br>Asp47fs (45.2%)<br>Ala57Glu (10.6%)<br>Arg72Thr (9.2%)<br>Asp88fs (12.0%)<br>Asp88Ala (13.0%)<br>Glu121Arg (6.0%)<br>Leu122Pro (7.4%) | Rv1979c Arg409Gln (100.0%) | XDR                       | 0.5   | 2.0  |
| L001      | Baseline | 06_L00101 | Wild type                                                                                                                                                | Rv1979c Arg409Gln (100.0%) |                           |       |      |
|           | Month 12 | 07_L00102 | Arg96Gly (8.8%)                                                                                                                                          | Rv1979c Arg409Gln (100.0%) |                           |       |      |
|           | Month 19 | 06_L00103 | Arg96Gly (100.0%)                                                                                                                                        | Rv1979c Arg409Gln (100.0%) |                           |       |      |
| H0147     | Baseline | 12_H0147B | Ala118Thr (100.0%)                                                                                                                                       | Rv1979c Glu38Asp (100.0%)  | MDR                       | 0.12* | 0.5  |
| H0184     | Baseline | 23_H0184B | Ile67fs (8.3%)                                                                                                                                           |                            | MDR                       | 0.25  | 2.0  |
| F8064     | Month 20 | 13_F8064B | Asp47fs (7.1%)<br>Ile67fs (54.3%)<br>Leu136Arg (22.6%)                                                                                                   | Rv1979c Arg409Gln (100.0%) | Pre-XDR                   | 1.0   | 2.0  |
| K0056     | Week 2   | 22_K00562 | Wild type                                                                                                                                                |                            | Rifampicin mono-resistant | 0.06  | 0.5  |
|           | Week 6   | 22_K00566 | Ile67fs (95.1%)                                                                                                                                          |                            |                           | 0.5   | 4.0  |
| K0084     | Baseline | 24_K0084B | Wild type                                                                                                                                                | Rv1979c Asp286Gly (100.0%) |                           | <0.03 | 0.5  |
|           | Week 2   | 24_K00842 | Wild type                                                                                                                                                | Rv1979c Asp286Gly (100.0%) |                           |       |      |
|           | Month 6  | 26_K0084K | Val1Ala (62.8%)<br>Gly37fs (8.1%)<br>Arg89Trp (11.8%)                                                                                                    | Rv1979c Asp286Gly (100.0%) |                           | 0.25  | 0.5  |

**Supplementary Table 3. List of lineage 2 samples included in the extended Southern Africa dataset.**

| Lineage | Sample ID | Accession   | Country      | Region          | Study                | Day | Month | Year |
|---------|-----------|-------------|--------------|-----------------|----------------------|-----|-------|------|
| 2       | 01_C4006B | SRR9971318  | South Africa | Southern Africa | Other AHRI KZN study | 13  | 11    | 2014 |
| 2       | 01_C4048B | SRR9971120  | South Africa | Southern Africa | Other AHRI KZN study | 26  | 3     | 2014 |
| 2       | 01_C4067B | SRR9971317  | South Africa | Southern Africa | Other AHRI KZN study | 11  | 4     | 2014 |
| 2       | 02_F1069B | SRR11349175 | South Africa | Southern Africa | Other AHRI KZN study | 14  | 12    | 2015 |
| 2       | 02_F1083B | SRR11349164 | South Africa | Southern Africa | Other AHRI KZN study | 25  | 1     | 2016 |
| 2       | 02_F1090B | SRR11349131 | South Africa | Southern Africa | Other AHRI KZN study | 3   | 2     | 2015 |
| 2       | 02_F1110B | SRR9971270  | South Africa | Southern Africa | Other AHRI KZN study | 4   | 4     | 2016 |
| 2       | 02_H0041B | SRR9971081  | South Africa | Southern Africa | Other AHRI KZN study | 26  | 10    | 2016 |
| 2       | 02_H0059B | SRR9971065  | South Africa | Southern Africa | Other AHRI KZN study | 8   | 2     | 2017 |
| 2       | 02_H0067B | SRR9971110  | South Africa | Southern Africa | Other AHRI KZN study | 30  | 3     | 2017 |
| 2       | 02_H0076B | SRR9971307  | South Africa | Southern Africa | Other AHRI KZN study | 24  | 5     | 2017 |
| 2       | 02_H0083B | SRR9971009  | South Africa | Southern Africa | Other AHRI KZN study | 19  | 6     | 2017 |
| 2       | 03_F1021B | SRR11349208 | South Africa | Southern Africa | Other AHRI KZN study | 24  | 8     | 2015 |
| 2       | 03_F1144B | SRR9971271  | South Africa | Southern Africa | Other AHRI KZN study | 25  | 7     | 2016 |
| 2       | 03_H0107B | SRR9971217  | South Africa | Southern Africa | Other AHRI KZN study | 29  | 9     | 2017 |
| 2       | 03_P0040B | SRR9971305  | South Africa | Southern Africa | PRAXIS (this study)  | 4   | 5     | 2017 |
| 2       | 03_P0050B | SRR9971087  | South Africa | Southern Africa | PRAXIS (this study)  | 30  | 5     | 2017 |
| 2       | 03_P0072B | SRR9971011  | South Africa | Southern Africa | PRAXIS (this study)  | 29  | 6     | 2017 |
| 2       | 03_P0082B | SRR9971019  | South Africa | Southern Africa | PRAXIS (this study)  | 12  | 7     | 2017 |
| 2       | 03_R0001B | SRR9971076  | South Africa | Southern Africa | Other AHRI KZN study | 20  | 12    | 2016 |
| 2       | 04_H0098B | SRR9971018  | South Africa | Southern Africa | Other AHRI KZN study | 25  | 8     | 2017 |
| 2       | 04_H0106B | SRR9971214  | South Africa | Southern Africa | Other AHRI KZN study | 21  | 9     | 2017 |
| 2       | 04_R0009B | SRR9971064  | South Africa | Southern Africa | Other AHRI KZN study | 13  | 2     | 2017 |
| 2       | 04_R0026B | SRR9971109  | South Africa | Southern Africa | Other AHRI KZN study | 27  | 3     | 2017 |
| 2       | 04_R0030B | SRR9971107  | South Africa | Southern Africa | Other AHRI KZN study | 7   | 4     | 2017 |
| 2       | 04_R0036B | SRR9971108  | South Africa | Southern Africa | Other AHRI KZN study | 24  | 4     | 2017 |
| 2       | 04_R0042B | SRR9971054  | South Africa | Southern Africa | Other AHRI KZN study | 8   | 5     | 2017 |
| 2       | 04_R0043B | SRR9971304  | South Africa | Southern Africa | Other AHRI KZN study | 8   | 5     | 2017 |
| 2       | 04_R0045B | SRR9971037  | South Africa | Southern Africa | Other AHRI KZN study | 16  | 5     | 2017 |
| 2       | 04_R0055B | SRR9971313  | South Africa | Southern Africa | Other AHRI KZN study | 13  | 6     | 2017 |
| 2       | 05_H0027B | SRR9971266  | South Africa | Southern Africa | Other AHRI KZN study | 4   | 8     | 2016 |
| 2       | 05_H0030B | SRR9971268  | South Africa | Southern Africa | Other AHRI KZN study | 29  | 8     | 2016 |
| 2       | 05_H0074B | SRR9971309  | South Africa | Southern Africa | Other AHRI KZN study | 17  | 5     | 2017 |
| 2       | 05_H0111B | SRR9971144  | South Africa | Southern Africa | Other AHRI KZN study | 2   | 11    | 2017 |
| 2       | 05_P0082A | SRR9971143  | South Africa | Southern Africa | PRAXIS (this study)  | 7   | 11    | 2017 |
| 2       | 05_R0056E | SRR9971016  | South Africa | Southern Africa | Other AHRI KZN study | 15  | 6     | 2017 |
| 2       | 05_R0057B | SRR9971015  | South Africa | Southern Africa | Other AHRI KZN study | 15  | 6     | 2017 |
| 2       | 05_R0059B | SRR9971010  | South Africa | Southern Africa | Other AHRI KZN study | 21  | 6     | 2017 |
| 2       | 05_R0060B | SRR9971012  | South Africa | Southern Africa | Other AHRI KZN study | 30  | 6     | 2017 |
| 2       | 05_R0061B | SRR9971005  | South Africa | Southern Africa | Other AHRI KZN study | 5   | 7     | 2017 |
| 2       | 05_R0064B | SRR9971022  | South Africa | Southern Africa | Other AHRI KZN study | 14  | 7     | 2017 |
| 2       | 05_R0074E | SRR9971025  | South Africa | Southern Africa | Other AHRI KZN study | 23  | 8     | 2017 |
| 2       | 05_R0076E | SRR9971223  | South Africa | Southern Africa | Other AHRI KZN study | 29  | 8     | 2017 |
| 2       | 05_R0087B | SRR9971218  | South Africa | Southern Africa | Other AHRI KZN study | 9   | 10    | 2017 |
| 2       | 05_R0091B | SRR9971208  | South Africa | Southern Africa | Other AHRI KZN study | 20  | 10    | 2017 |
| 2       | 05_R0092B | SRR9971149  | South Africa | Southern Africa | Other AHRI KZN study | 23  | 10    | 2017 |
| 2       | 05_R0094E | SRR11349190 | South Africa | Southern Africa | Other AHRI KZN study | 31  | 10    | 2017 |
| 2       | 05_R0095B | SRR9971145  | South Africa | Southern Africa | Other AHRI KZN study | 31  | 10    | 2017 |
| 2       | 05_R0098B | SRR9971142  | South Africa | Southern Africa | Other AHRI KZN study | 8   | 11    | 2017 |
| 2       | 06_H0032B | SRR9971265  | South Africa | Southern Africa | Other AHRI KZN study | 29  | 8     | 2016 |
| 2       | 06_H0035B | SRR9971264  | South Africa | Southern Africa | Other AHRI KZN study | 23  | 9     | 2016 |
| 2       | 06_H0037B | SRR9971267  | South Africa | Southern Africa | Other AHRI KZN study | 23  | 9     | 2016 |
| 2       | 06_H0042B | SRR9971078  | South Africa | Southern Africa | Other AHRI KZN study | 26  | 10    | 2016 |
| 2       | 06_H0070B | SRR9971116  | South Africa | Southern Africa | Other AHRI KZN study | 3   | 5     | 2017 |
| 2       | 06_H0080B | SRR9971306  | South Africa | Southern Africa | Other AHRI KZN study | 26  | 5     | 2017 |
| 2       | 06_H0086B | SRR9971020  | South Africa | Southern Africa | Other AHRI KZN study | 6   | 7     | 2017 |
| 2       | 06_L00501 | SRR9971263  | South Africa | Southern Africa | Other AHRI KZN study | 6   | 10    | 2016 |
| 2       | 06_P0063B | SRR9971085  | South Africa | Southern Africa | PRAXIS (this study)  | 8   | 6     | 2017 |
| 2       | 06_P0066B | SRR9971013  | South Africa | Southern Africa | PRAXIS (this study)  | 13  | 6     | 2017 |
| 2       | 06_P00825 | SRR9971254  | South Africa | Southern Africa | PRAXIS (this study)  | 5   | 12    | 2017 |
| 2       | 06_P00826 | SRR9971329  | South Africa | Southern Africa | PRAXIS (this study)  | 5   | 1     | 2018 |
| 2       | 06_P0085B | SRR9971021  | South Africa | Southern Africa | PRAXIS (this study)  | 19  | 7     | 2017 |
| 2       | 06_P01014 | SRR9971255  | South Africa | Southern Africa | PRAXIS (this study)  | 5   | 12    | 2017 |
| 2       | 06_P0128B | SRR9971220  | South Africa | Southern Africa | PRAXIS (this study)  | 29  | 9     | 2017 |
| 2       | 06_P0129B | SRR9971219  | South Africa | Southern Africa | PRAXIS (this study)  | 29  | 9     | 2017 |

|   |           |             |              |                 |                      |    |    |      |
|---|-----------|-------------|--------------|-----------------|----------------------|----|----|------|
| 2 | 07_K0005B | SRR9971330  | South Africa | Southern Africa | Other AHRI KZN study | 19 | 10 | 2017 |
| 2 | 07_K0007B | SRR9971148  | South Africa | Southern Africa | Other AHRI KZN study | 26 | 10 | 2017 |
| 2 | 08_H0006B | SRR9971262  | South Africa | Southern Africa | Other AHRI KZN study | 17 | 2  | 2016 |
| 2 | 08_H0021B | SRR9971269  | South Africa | Southern Africa | Other AHRI KZN study | 9  | 5  | 2016 |
| 2 | 08_H0046B | SRR9971079  | South Africa | Southern Africa | Other AHRI KZN study | 16 | 11 | 2016 |
| 2 | 08_H0056B | SRR9971249  | South Africa | Southern Africa | Other AHRI KZN study | 27 | 1  | 2017 |
| 2 | 08_H0088B | SRR9971006  | South Africa | Southern Africa | Other AHRI KZN study | 6  | 7  | 2017 |
| 2 | 08_H0123B | SRR9971324  | South Africa | Southern Africa | Other AHRI KZN study | 23 | 1  | 2018 |
| 2 | 08_H0124B | SRR9971321  | South Africa | Southern Africa | Other AHRI KZN study | 25 | 1  | 2018 |
| 2 | 08_H0125B | SRR9971322  | South Africa | Southern Africa | Other AHRI KZN study | 25 | 1  | 2018 |
| 2 | 08_P0169B | SRR9971257  | South Africa | Southern Africa | PRAXIS (this study)  | 6  | 12 | 2017 |
| 2 | 08_P0176B | SRR9971327  | South Africa | Southern Africa | PRAXIS (this study)  | 12 | 1  | 2018 |
| 2 | 08_P0179B | SRR9971325  | South Africa | Southern Africa | PRAXIS (this study)  | 19 | 1  | 2018 |
| 2 | 08_R0025B | SRR9971112  | South Africa | Southern Africa | Other AHRI KZN study | 24 | 3  | 2017 |
| 2 | 08_R0066B | SRR9971024  | South Africa | Southern Africa | Other AHRI KZN study | 21 | 7  | 2017 |
| 2 | 08_R0067B | SRR9971023  | South Africa | Southern Africa | Other AHRI KZN study | 25 | 7  | 2017 |
| 2 | 09_H0096B | SRR9971222  | South Africa | Southern Africa | Other AHRI KZN study | 25 | 8  | 2017 |
| 2 | 09_H0122B | SRR9971323  | South Africa | Southern Africa | Other AHRI KZN study | 23 | 1  | 2018 |
| 2 | 09_H0129B | SRR9971029  | South Africa | Southern Africa | Other AHRI KZN study | 5  | 3  | 2018 |
| 2 | 09_P0200B | SRR9971028  | South Africa | Southern Africa | PRAXIS (this study)  | 20 | 2  | 2018 |
| 2 | 09_R0040B | SRR9971115  | South Africa | Southern Africa | Other AHRI KZN study | 2  | 5  | 2017 |
| 2 | 09_R0069E | SRR9971154  | South Africa | Southern Africa | Other AHRI KZN study | 11 | 8  | 2017 |
| 2 | 09_R0075E | SRR9971017  | South Africa | Southern Africa | Other AHRI KZN study | 25 | 8  | 2017 |
| 2 | 10_H0054B | SRR9971058  | South Africa | Southern Africa | Other AHRI KZN study | 24 | 1  | 2017 |
| 2 | 10_H0065B | SRR9971111  | South Africa | Southern Africa | Other AHRI KZN study | 24 | 3  | 2017 |
| 2 | 10_H0133B | SRR9971034  | South Africa | Southern Africa | Other AHRI KZN study | 14 | 3  | 2018 |
| 2 | 10_H0134B | SRR9971035  | South Africa | Southern Africa | Other AHRI KZN study | 22 | 3  | 2018 |
| 2 | 10_H0136B | SRR9971088  | South Africa | Southern Africa | Other AHRI KZN study | 16 | 4  | 2018 |
| 2 | 10_H0138B | SRR9971089  | South Africa | Southern Africa | Other AHRI KZN study | 16 | 4  | 2018 |
| 2 | 10_K0025B | SRR9971030  | South Africa | Southern Africa | Other AHRI KZN study | 9  | 2  | 2018 |
| 2 | 10_K0026B | SRR9971031  | South Africa | Southern Africa | Other AHRI KZN study | 14 | 2  | 2018 |
| 2 | 10_R0099B | SRR9971156  | South Africa | Southern Africa | Other AHRI KZN study | 10 | 11 | 2017 |
| 2 | 10_R0100B | SRR9971155  | South Africa | Southern Africa | Other AHRI KZN study | 20 | 11 | 2017 |
| 2 | 11_H0001B | SRR9971260  | South Africa | Southern Africa | Other AHRI KZN study | 21 | 1  | 2016 |
| 2 | 11_H0119B | SRR9971259  | South Africa | Southern Africa | Other AHRI KZN study | 7  | 12 | 2017 |
| 2 | 11_H0141B | SRR9971353  | South Africa | Southern Africa | Other AHRI KZN study | 14 | 5  | 2018 |
| 2 | 11_K0009B | SRR9971256  | South Africa | Southern Africa | Other AHRI KZN study | 5  | 12 | 2017 |
| 2 | 11_K0010B | SRR11349182 | South Africa | Southern Africa | Other AHRI KZN study | 7  | 12 | 2017 |
| 2 | 11_K0013B | SRR9971328  | South Africa | Southern Africa | Other AHRI KZN study | 10 | 1  | 2018 |
| 2 | 11_K0021B | SRR11349180 | South Africa | Southern Africa | Other AHRI KZN study | 31 | 1  | 2018 |
| 2 | 11_P0155B | SRR9971147  | South Africa | Southern Africa | PRAXIS (this study)  | 31 | 10 | 2017 |
| 2 | 11_P0165B | SRR9971253  | South Africa | Southern Africa | PRAXIS (this study)  | 27 | 11 | 2017 |
| 2 | 12_F8103B | SRR9971354  | South Africa | Southern Africa | Other AHRI KZN study | 10 | 5  | 2018 |
| 2 | 12_K0057B | SRR9971356  | South Africa | Southern Africa | Other AHRI KZN study | 6  | 6  | 2018 |
| 2 | 12_P3004B | SRR9971355  | South Africa | Southern Africa | PRAXIS (this study)  | 7  | 6  | 2018 |
| 2 | 12_P3008B | SRR9971357  | South Africa | Southern Africa | PRAXIS (this study)  | 19 | 6  | 2018 |
| 2 | 12_P3010B | SRR9971350  | South Africa | Southern Africa | PRAXIS (this study)  | 27 | 6  | 2018 |
| 2 | 13_F8064B | SRR9971308  | South Africa | Southern Africa | Other AHRI KZN study | 23 | 5  | 2017 |
| 2 | 13_F8078B | SRR9971213  | South Africa | Southern Africa | Other AHRI KZN study | 31 | 8  | 2017 |
| 2 | 13_K0036B | SRR9971032  | South Africa | Southern Africa | Other AHRI KZN study | 27 | 3  | 2018 |
| 2 | 13_K0040B | SRR9971033  | South Africa | Southern Africa | Other AHRI KZN study | 10 | 4  | 2018 |
| 2 | 13_K0045B | SRR9971352  | South Africa | Southern Africa | Other AHRI KZN study | 8  | 5  | 2018 |
| 2 | 13_K0060B | SRR9971349  | South Africa | Southern Africa | Other AHRI KZN study | 27 | 6  | 2018 |
| 2 | 13_K0062B | SRR9971140  | South Africa | Southern Africa | Other AHRI KZN study | 9  | 7  | 2018 |
| 2 | 14_F8102B | SRR9971351  | South Africa | Southern Africa | Other AHRI KZN study | 8  | 5  | 2018 |
| 2 | 14_H0161B | SRR11349173 | South Africa | Southern Africa | Other AHRI KZN study | 8  | 8  | 2018 |
| 2 | 14_H0166B | SRR9971211  | South Africa | Southern Africa | Other AHRI KZN study | 29 | 8  | 2018 |
| 2 | 14_K0016B | SRR9971326  | South Africa | Southern Africa | Other AHRI KZN study | 16 | 1  | 2018 |
| 2 | 14_P02006 | SRR11349170 | South Africa | Southern Africa | PRAXIS (this study)  | 3  | 8  | 2018 |
| 2 | 14_P3019B | SRR9971205  | South Africa | Southern Africa | PRAXIS (this study)  | 24 | 8  | 2018 |
| 2 | 14_P3410B | SRR9971135  | South Africa | Southern Africa | PRAXIS (this study)  | 18 | 7  | 2018 |
| 2 | 14_P3510B | SRR9971138  | South Africa | Southern Africa | PRAXIS (this study)  | 28 | 6  | 2018 |
| 2 | 15_H0157B | SRR11349169 | South Africa | Southern Africa | Other AHRI KZN study | 24 | 7  | 2018 |
| 2 | 15_H0163B | SRR11349168 | South Africa | Southern Africa | Other AHRI KZN study | 16 | 8  | 2018 |
| 2 | 15_K0061B | SRR9971139  | South Africa | Southern Africa | Other AHRI KZN study | 3  | 7  | 2018 |
| 2 | 15_K0063B | SRR9971134  | South Africa | Southern Africa | Other AHRI KZN study | 17 | 7  | 2018 |

|   |            |             |              |                 |                      |         |         |         |
|---|------------|-------------|--------------|-----------------|----------------------|---------|---------|---------|
| 2 | 15_K0064B  | SRR9971136  | South Africa | Southern Africa | Other AHRI KZN study | 18      | 7       | 2018    |
| 2 | 15_K0065B  | SRR9971137  | South Africa | Southern Africa | Other AHRI KZN study | 19      | 7       | 2018    |
| 2 | 15_K0071B  | SRR11349159 | South Africa | Southern Africa | Other AHRI KZN study | 24      | 8       | 2018    |
| 2 | 16_R0017B  | SRR9971113  | South Africa | Southern Africa | Other AHRI KZN study | 10      | 3       | 2017    |
| 2 | 16_R0020B  | SRR9971114  | South Africa | Southern Africa | Other AHRI KZN study | 15      | 3       | 2017    |
| 2 | 21_P3029B  | SRR9971060  | South Africa | Southern Africa | PRAXIS (this study)  | 5       | 10      | 2018    |
| 2 | 21_P3418B  | SRR9971216  | South Africa | Southern Africa | PRAXIS (this study)  | 25      | 9       | 2018    |
| 2 | 21_P35242  | SRR9971062  | South Africa | Southern Africa | PRAXIS (this study)  | 6       | 11      | 2018    |
| 2 | 21_P3524B  | SRR9971210  | South Africa | Southern Africa | PRAXIS (this study)  | 5       | 9       | 2018    |
| 2 | 22_H0039B  | SRR9971080  | South Africa | Southern Africa | Other AHRI KZN study | 12      | 10      | 2016    |
| 2 | 22_K00562  | SRR9971358  | South Africa | Southern Africa | Other AHRI KZN study | 18      | 6       | 2018    |
| 2 | 22_K00566  | SRR9971141  | South Africa | Southern Africa | Other AHRI KZN study | 16      | 7       | 2018    |
| 2 | 22_K0077B  | SRR9971209  | South Africa | Southern Africa | Other AHRI KZN study | 20      | 9       | 2018    |
| 2 | 22_P3415B  | SRR9971206  | South Africa | Southern Africa | PRAXIS (this study)  | 17      | 8       | 2018    |
| 2 | 23_H0183B  | SRR11349151 | South Africa | Southern Africa | Other AHRI KZN study | 29      | 11      | 2018    |
| 2 | 23_H0184B  | SRR9971248  | South Africa | Southern Africa | Other AHRI KZN study | 29      | 11      | 2018    |
| 2 | 23_H0190B  | SRR9971247  | South Africa | Southern Africa | Other AHRI KZN study | 12      | 12      | 2018    |
| 2 | 23_K0079B  | SRR9971215  | South Africa | Southern Africa | Other AHRI KZN study | 2       | 10      | 2018    |
| 2 | 23_K0085B  | SRR9971059  | South Africa | Southern Africa | Other AHRI KZN study | 15      | 10      | 2018    |
| 2 | ERR1034914 | ERR1034914  | South Africa | Southern Africa | Publicly available   | Missing | Missing | Missing |
| 2 | ERR1633777 | ERR1633777  | South Africa | Southern Africa | Publicly available   | 1       | 7       | 2010    |
| 2 | ERR1633791 | ERR1633791  | South Africa | Southern Africa | Publicly available   | 1       | 7       | 2010    |
| 2 | ERR1633796 | ERR1633796  | South Africa | Southern Africa | Publicly available   | 1       | 7       | 2010    |
| 2 | ERR1633800 | ERR1633800  | South Africa | Southern Africa | Publicly available   | 1       | 7       | 2010    |
| 2 | ERR1633809 | ERR1633809  | South Africa | Southern Africa | Publicly available   | 1       | 7       | 2010    |
| 2 | ERR1633816 | ERR1633816  | South Africa | Southern Africa | Publicly available   | 1       | 7       | 2010    |
| 2 | ERR1633819 | ERR1633819  | South Africa | Southern Africa | Publicly available   | 1       | 7       | 2010    |
| 2 | ERR1633822 | ERR1633822  | South Africa | Southern Africa | Publicly available   | 1       | 7       | 2010    |
| 2 | ERR1633823 | ERR1633823  | South Africa | Southern Africa | Publicly available   | 1       | 7       | 2010    |
| 2 | ERR1633824 | ERR1633824  | South Africa | Southern Africa | Publicly available   | 1       | 7       | 2010    |
| 2 | ERR1633828 | ERR1633828  | South Africa | Southern Africa | Publicly available   | 1       | 7       | 2010    |
| 2 | ERR1633829 | ERR1633829  | South Africa | Southern Africa | Publicly available   | 1       | 7       | 2010    |
| 2 | ERR1633831 | ERR1633831  | South Africa | Southern Africa | Publicly available   | 1       | 7       | 2010    |
| 2 | ERR1633835 | ERR1633835  | South Africa | Southern Africa | Publicly available   | 1       | 7       | 2010    |
| 2 | ERR1633844 | ERR1633844  | South Africa | Southern Africa | Publicly available   | 1       | 7       | 2010    |
| 2 | ERR1633868 | ERR1633868  | South Africa | Southern Africa | Publicly available   | 1       | 7       | 2010    |
| 2 | ERR1633872 | ERR1633872  | South Africa | Southern Africa | Publicly available   | 1       | 7       | 2010    |
| 2 | ERR1633881 | ERR1633881  | South Africa | Southern Africa | Publicly available   | 1       | 7       | 2010    |
| 2 | ERR1633882 | ERR1633882  | South Africa | Southern Africa | Publicly available   | 1       | 7       | 2010    |
| 2 | ERR1633885 | ERR1633885  | South Africa | Southern Africa | Publicly available   | 1       | 7       | 2010    |
| 2 | ERR1633895 | ERR1633895  | South Africa | Southern Africa | Publicly available   | 1       | 7       | 2010    |
| 2 | ERR1633896 | ERR1633896  | South Africa | Southern Africa | Publicly available   | 1       | 7       | 2010    |
| 2 | ERR1633915 | ERR1633915  | South Africa | Southern Africa | Publicly available   | 1       | 7       | 2010    |
| 2 | ERR1633922 | ERR1633922  | South Africa | Southern Africa | Publicly available   | 1       | 7       | 2010    |
| 2 | ERR1633925 | ERR1633925  | South Africa | Southern Africa | Publicly available   | 1       | 7       | 2010    |
| 2 | ERR1633928 | ERR1633928  | South Africa | Southern Africa | Publicly available   | 1       | 7       | 2010    |
| 2 | ERR1633933 | ERR1633933  | South Africa | Southern Africa | Publicly available   | 1       | 7       | 2010    |
| 2 | ERR1633938 | ERR1633938  | South Africa | Southern Africa | Publicly available   | 1       | 7       | 2010    |
| 2 | ERR1633939 | ERR1633939  | South Africa | Southern Africa | Publicly available   | 1       | 7       | 2010    |
| 2 | ERR1633944 | ERR1633944  | South Africa | Southern Africa | Publicly available   | 1       | 7       | 2010    |
| 2 | ERR1633946 | ERR1633946  | South Africa | Southern Africa | Publicly available   | 1       | 7       | 2010    |
| 2 | ERR1633948 | ERR1633948  | South Africa | Southern Africa | Publicly available   | 1       | 7       | 2010    |
| 2 | ERR1633951 | ERR1633951  | South Africa | Southern Africa | Publicly available   | 1       | 7       | 2010    |
| 2 | ERR1633955 | ERR1633955  | South Africa | Southern Africa | Publicly available   | 1       | 7       | 2010    |
| 2 | ERR1633956 | ERR1633956  | South Africa | Southern Africa | Publicly available   | 1       | 7       | 2010    |
| 2 | ERR1633962 | ERR1633962  | South Africa | Southern Africa | Publicly available   | 1       | 7       | 2010    |
| 2 | ERR1633964 | ERR1633964  | South Africa | Southern Africa | Publicly available   | 1       | 7       | 2010    |
| 2 | ERR1873389 | ERR1873389  | South Africa | Southern Africa | Publicly available   | 1       | 7       | 2009    |
| 2 | ERR1873390 | ERR1873390  | South Africa | Southern Africa | Publicly available   | 1       | 7       | 2009    |
| 2 | ERR1873394 | ERR1873394  | South Africa | Southern Africa | Publicly available   | 1       | 7       | 2009    |
| 2 | ERR1873395 | ERR1873395  | South Africa | Southern Africa | Publicly available   | 1       | 7       | 2008    |
| 2 | ERR1873397 | ERR1873397  | South Africa | Southern Africa | Publicly available   | 1       | 7       | 2010    |
| 2 | ERR1873398 | ERR1873398  | South Africa | Southern Africa | Publicly available   | 1       | 7       | 2010    |
| 2 | ERR1873399 | ERR1873399  | South Africa | Southern Africa | Publicly available   | 1       | 7       | 2010    |
| 2 | ERR1873402 | ERR1873402  | South Africa | Southern Africa | Publicly available   | 1       | 7       | 2011    |
| 2 | ERR1873403 | ERR1873403  | South Africa | Southern Africa | Publicly available   | 1       | 7       | 2011    |







|   |            |             |              |                 |                      |         |         |         |
|---|------------|-------------|--------------|-----------------|----------------------|---------|---------|---------|
| 2 | ERR550739  | ERR550739   | South Africa | Southern Africa | Publicly available   | 1       | 7       | 2004    |
| 2 | ERR551071  | ERR551071   | eSwatini     | Southern Africa | Publicly available   | 1       | 7       | 2009    |
| 2 | ERR551079  | ERR551079   | eSwatini     | Southern Africa | Publicly available   | 1       | 7       | 2009    |
| 2 | ERR551854  | ERR551854   | eSwatini     | Southern Africa | Publicly available   | 1       | 7       | 2009    |
| 2 | ERR552743  | ERR552743   | eSwatini     | Southern Africa | Publicly available   | 1       | 7       | 2009    |
| 2 | ERR553116  | ERR553116   | eSwatini     | Southern Africa | Publicly available   | 1       | 7       | 2009    |
| 2 | ERR553156  | ERR553156   | eSwatini     | Southern Africa | Publicly available   | 1       | 7       | 2009    |
| 2 | ERR553313  | ERR553313   | eSwatini     | Southern Africa | Publicly available   | 1       | 7       | 2009    |
| 2 | ERR553324  | ERR553324   | eSwatini     | Southern Africa | Publicly available   | 1       | 7       | 2009    |
| 2 | KR_F1051B  | SRR9971075  | South Africa | Southern Africa | Other AHRI KZN study | 9       | 11      | 2015    |
| 2 | KR_F1056B  | SRR11349132 | South Africa | Southern Africa | Other AHRI KZN study | 16      | 11      | 2015    |
| 2 | KR_F1061B  | SRR11349207 | South Africa | Southern Africa | Other AHRI KZN study | 30      | 11      | 2015    |
| 2 | KR_F1066B  | SRR11349205 | South Africa | Southern Africa | Other AHRI KZN study | 9       | 12      | 2015    |
| 2 | KR_F1067B  | SRR11349204 | South Africa | Southern Africa | Other AHRI KZN study | 9       | 12      | 2015    |
| 2 | KR_F1126B  | SRR11349196 | South Africa | Southern Africa | Other AHRI KZN study | 30      | 5       | 2016    |
| 2 | SRR1019146 | SRR1019146  | South Africa | Southern Africa | Publicly available   | 1       | 7       | 2013    |
| 2 | SRR1140900 | SRR1140900  | South Africa | Southern Africa | Publicly available   | 1       | 7       | 2013    |
| 2 | SRR1140901 | SRR1140901  | South Africa | Southern Africa | Publicly available   | 1       | 7       | 2013    |
| 2 | SRR1140916 | SRR1140916  | South Africa | Southern Africa | Publicly available   | 1       | 7       | 2013    |
| 2 | SRR1140928 | SRR1140928  | South Africa | Southern Africa | Publicly available   | 1       | 7       | 2013    |
| 2 | SRR1140940 | SRR1140940  | South Africa | Southern Africa | Publicly available   | 1       | 7       | 2013    |
| 2 | SRR1140947 | SRR1140947  | South Africa | Southern Africa | Publicly available   | 1       | 7       | 2013    |
| 2 | SRR1140948 | SRR1140948  | South Africa | Southern Africa | Publicly available   | 1       | 7       | 2013    |
| 2 | SRR1140964 | SRR1140964  | South Africa | Southern Africa | Publicly available   | 1       | 7       | 2013    |
| 2 | SRR1167167 | SRR1167167  | South Africa | Southern Africa | Publicly available   | Missing | Missing | Missing |
| 2 | SRR1173130 | SRR1173130  | South Africa | Southern Africa | Publicly available   | 1       | 7       | 2013    |
| 2 | SRR1173289 | SRR1173289  | South Africa | Southern Africa | Publicly available   | Missing | Missing | Missing |
| 2 | SRR1173814 | SRR1173814  | South Africa | Southern Africa | Publicly available   | Missing | Missing | Missing |
| 2 | SRR1173850 | SRR1173850  | South Africa | Southern Africa | Publicly available   | Missing | Missing | Missing |
| 2 | SRR1175054 | SRR1175054  | South Africa | Southern Africa | Publicly available   | 1       | 7       | 2013    |
| 2 | SRR1175358 | SRR1175358  | South Africa | Southern Africa | Publicly available   | 1       | 7       | 2013    |
| 2 | SRR1180352 | SRR1180352  | South Africa | Southern Africa | Publicly available   | 1       | 7       | 2013    |
| 2 | SRR1180357 | SRR1180357  | South Africa | Southern Africa | Publicly available   | 1       | 7       | 2013    |
| 2 | SRR1180378 | SRR1180378  | South Africa | Southern Africa | Publicly available   | 1       | 7       | 2013    |
| 2 | SRR1180385 | SRR1180385  | South Africa | Southern Africa | Publicly available   | 1       | 7       | 2013    |
| 2 | SRR1180396 | SRR1180396  | South Africa | Southern Africa | Publicly available   | 1       | 7       | 2013    |
| 2 | SRR1180398 | SRR1180398  | South Africa | Southern Africa | Publicly available   | 1       | 7       | 2013    |
| 2 | SRR1180400 | SRR1180400  | South Africa | Southern Africa | Publicly available   | 1       | 7       | 2013    |
| 2 | SRR1180404 | SRR1180404  | South Africa | Southern Africa | Publicly available   | 1       | 7       | 2013    |
| 2 | SRR1180421 | SRR1180421  | South Africa | Southern Africa | Publicly available   | 1       | 7       | 2013    |
| 2 | SRR1180427 | SRR1180427  | South Africa | Southern Africa | Publicly available   | 1       | 7       | 2013    |
| 2 | SRR1180432 | SRR1180432  | South Africa | Southern Africa | Publicly available   | 1       | 7       | 2013    |
| 2 | SRR1180434 | SRR1180434  | South Africa | Southern Africa | Publicly available   | 1       | 7       | 2013    |
| 2 | SRR1180442 | SRR1180442  | South Africa | Southern Africa | Publicly available   | 1       | 7       | 2013    |
| 2 | SRR1182970 | SRR1182970  | South Africa | Southern Africa | Publicly available   | 1       | 7       | 2013    |
| 2 | SRR1182987 | SRR1182987  | South Africa | Southern Africa | Publicly available   | 1       | 7       | 2013    |
| 2 | SRR1183012 | SRR1183012  | South Africa | Southern Africa | Publicly available   | 1       | 7       | 2013    |
| 2 | SRR1183048 | SRR1183048  | South Africa | Southern Africa | Publicly available   | 1       | 7       | 2013    |
| 2 | SRR1183082 | SRR1183082  | South Africa | Southern Africa | Publicly available   | 1       | 7       | 2011    |
| 2 | SRR1183089 | SRR1183089  | South Africa | Southern Africa | Publicly available   | 1       | 7       | 2013    |
| 2 | SRR1183095 | SRR1183095  | South Africa | Southern Africa | Publicly available   | 1       | 7       | 2013    |
| 2 | SRR1183120 | SRR1183120  | South Africa | Southern Africa | Publicly available   | 1       | 7       | 2013    |
| 2 | SRR1183136 | SRR1183136  | South Africa | Southern Africa | Publicly available   | 1       | 7       | 2013    |
| 2 | SRR1184296 | SRR1184296  | South Africa | Southern Africa | Publicly available   | 1       | 7       | 2013    |
| 2 | SRR1184303 | SRR1184303  | South Africa | Southern Africa | Publicly available   | 1       | 7       | 2013    |
| 2 | SRR1184307 | SRR1184307  | South Africa | Southern Africa | Publicly available   | 1       | 7       | 2013    |
| 2 | SRR1184311 | SRR1184311  | South Africa | Southern Africa | Publicly available   | 1       | 7       | 2013    |
| 2 | SRR1184318 | SRR1184318  | South Africa | Southern Africa | Publicly available   | 1       | 7       | 2013    |
| 2 | SRR1184323 | SRR1184323  | South Africa | Southern Africa | Publicly available   | 1       | 7       | 2013    |
| 2 | SRR1184330 | SRR1184330  | South Africa | Southern Africa | Publicly available   | 1       | 7       | 2013    |
| 2 | SRR1184332 | SRR1184332  | South Africa | Southern Africa | Publicly available   | 1       | 7       | 2013    |
| 2 | SRR1184338 | SRR1184338  | South Africa | Southern Africa | Publicly available   | 1       | 7       | 2013    |
| 2 | SRR1184344 | SRR1184344  | South Africa | Southern Africa | Publicly available   | 1       | 7       | 2013    |
| 2 | SRR1184364 | SRR1184364  | South Africa | Southern Africa | Publicly available   | 1       | 7       | 2013    |
| 2 | SRR1184365 | SRR1184365  | South Africa | Southern Africa | Publicly available   | 1       | 7       | 2013    |
| 2 | SRR1184370 | SRR1184370  | South Africa | Southern Africa | Publicly available   | 1       | 7       | 2013    |

|   |            |            |              |                 |                    |    |   |      |
|---|------------|------------|--------------|-----------------|--------------------|----|---|------|
| 2 | SRR1184373 | SRR1184373 | South Africa | Southern Africa | Publicly available | 1  | 7 | 2013 |
| 2 | SRR1184376 | SRR1184376 | South Africa | Southern Africa | Publicly available | 1  | 7 | 2013 |
| 2 | SRR1184386 | SRR1184386 | South Africa | Southern Africa | Publicly available | 1  | 7 | 2013 |
| 2 | SRR1184387 | SRR1184387 | South Africa | Southern Africa | Publicly available | 1  | 7 | 2013 |
| 2 | SRR2101676 | SRR2101676 | South Africa | Southern Africa | Publicly available | 18 | 5 | 2013 |
| 2 | SRR6207273 | SRR6207273 | South Africa | Southern Africa | Publicly available | 1  | 7 | 2012 |
| 2 | SRR6207277 | SRR6207277 | South Africa | Southern Africa | Publicly available | 1  | 7 | 2012 |
| 2 | SRR6207279 | SRR6207279 | South Africa | Southern Africa | Publicly available | 1  | 7 | 2012 |
| 2 | SRR6207281 | SRR6207281 | South Africa | Southern Africa | Publicly available | 1  | 7 | 2012 |
| 2 | SRR6207285 | SRR6207285 | South Africa | Southern Africa | Publicly available | 1  | 7 | 2012 |
| 2 | SRR6207286 | SRR6207286 | South Africa | Southern Africa | Publicly available | 1  | 7 | 2012 |
| 2 | SRR832982  | SRR832982  | South Africa | Southern Africa | Publicly available | 1  | 7 | 2008 |
| 2 | SRR832985  | SRR832985  | South Africa | Southern Africa | Publicly available | 1  | 7 | 2008 |
| 2 | SRR832998  | SRR832998  | South Africa | Southern Africa | Publicly available | 1  | 7 | 2008 |
| 2 | SRR833001  | SRR833001  | South Africa | Southern Africa | Publicly available | 1  | 7 | 2008 |
| 2 | SRR833007  | SRR833007  | South Africa | Southern Africa | Publicly available | 1  | 7 | 2008 |
| 2 | SRR833010  | SRR833010  | South Africa | Southern Africa | Publicly available | 1  | 7 | 2010 |
| 2 | SRR833043  | SRR833043  | South Africa | Southern Africa | Publicly available | 1  | 7 | 2010 |
| 2 | SRR833057  | SRR833057  | South Africa | Southern Africa | Publicly available | 1  | 7 | 2010 |
| 2 | SRR833061  | SRR833061  | South Africa | Southern Africa | Publicly available | 1  | 7 | 2008 |
| 2 | SRR833092  | SRR833092  | South Africa | Southern Africa | Publicly available | 1  | 7 | 2010 |
| 2 | SRR833112  | SRR833112  | South Africa | Southern Africa | Publicly available | 1  | 7 | 2008 |
| 2 | SRR833133  | SRR833133  | South Africa | Southern Africa | Publicly available | 1  | 7 | 2009 |
| 2 | SRR833142  | SRR833142  | South Africa | Southern Africa | Publicly available | 1  | 7 | 2010 |
| 2 | SRR833143  | SRR833143  | South Africa | Southern Africa | Publicly available | 1  | 7 | 2008 |
| 2 | SRR833145  | SRR833145  | South Africa | Southern Africa | Publicly available | 1  | 7 | 2010 |
| 2 | SRR833147  | SRR833147  | South Africa | Southern Africa | Publicly available | 1  | 7 | 2008 |
| 2 | SRR833190  | SRR833190  | South Africa | Southern Africa | Publicly available | 1  | 7 | 2010 |
| 2 | SRR833192  | SRR833192  | South Africa | Southern Africa | Publicly available | 1  | 7 | 2010 |
| 2 | SRR847786  | SRR847786  | South Africa | Southern Africa | Publicly available | 1  | 7 | 2012 |
| 2 | SRR847799  | SRR847799  | South Africa | Southern Africa | Publicly available | 1  | 7 | 2011 |
| 2 | SRR958198  | SRR958198  | South Africa | Southern Africa | Publicly available | 1  | 7 | 2008 |
| 2 | SRR958231  | SRR958231  | South Africa | Southern Africa | Publicly available | 1  | 7 | 2008 |
| 2 | SRR958234  | SRR958234  | South Africa | Southern Africa | Publicly available | 1  | 7 | 2008 |
| 2 | SRR958237  | SRR958237  | South Africa | Southern Africa | Publicly available | 1  | 7 | 2008 |

**Supplementary Table 4. List of lineage 4 samples included in the extended Southern Africa dataset.**

| Lineage | Sample ID | Accession   | Country      | Study                | Region          | Day | Month | Year |
|---------|-----------|-------------|--------------|----------------------|-----------------|-----|-------|------|
| 4       | 01_C0067B | SRR9971303  | South Africa | Other AHRI KZN study | Southern Africa | 22  | 10    | 2013 |
| 4       | 01_C4027B | SRR9971302  | South Africa | Other AHRI KZN study | Southern Africa | 26  | 2     | 2014 |
| 4       | 01_F1045B | SRR11349211 | South Africa | Other AHRI KZN study | Southern Africa | 10  | 7     | 2015 |
| 4       | 01_F1049B | SRR11349210 | South Africa | Other AHRI KZN study | Southern Africa | 19  | 10    | 2015 |
| 4       | 01_F1064B | SRR9971298  | South Africa | Other AHRI KZN study | Southern Africa | 12  | 2     | 2015 |
| 4       | 01_F1098B | SRR11349186 | South Africa | Other AHRI KZN study | Southern Africa | 29  | 2     | 2016 |
| 4       | 01_P00271 | SRR9971044  | South Africa | PRAXIS (this study)  | Southern Africa | 22  | 3     | 2017 |
| 4       | 01_P00273 | SRR9971043  | South Africa | PRAXIS (this study)  | Southern Africa | 9   | 6     | 2017 |
| 4       | 01_P00274 | SRR9971042  | South Africa | PRAXIS (this study)  | Southern Africa | 21  | 6     | 2017 |
| 4       | 01_P0033B | SRR9971041  | South Africa | PRAXIS (this study)  | Southern Africa | 16  | 3     | 2017 |
| 4       | 01_P0034B | SRR9971040  | South Africa | PRAXIS (this study)  | Southern Africa | 29  | 3     | 2017 |
| 4       | 01_P0037B | SRR9971039  | South Africa | PRAXIS (this study)  | Southern Africa | 12  | 4     | 2017 |
| 4       | 02_F1086B | SRR11349153 | South Africa | Other AHRI KZN study | Southern Africa | 2   | 1     | 2016 |
| 4       | 02_F1091B | SRR9971008  | South Africa | Other AHRI KZN study | Southern Africa | 2   | 8     | 2016 |
| 4       | 02_F1092B | SRR9971310  | South Africa | Other AHRI KZN study | Southern Africa | 2   | 10    | 2016 |
| 4       | 02_F1093B | SRR11349197 | South Africa | Other AHRI KZN study | Southern Africa | 2   | 10    | 2016 |
| 4       | 02_F1097B | SRR9971204  | South Africa | Other AHRI KZN study | Southern Africa | 24  | 2     | 2016 |
| 4       | 02_H0007B | SRR11349195 | South Africa | Other AHRI KZN study | Southern Africa | 17  | 2     | 2016 |
| 4       | 02_H0045B | SRR9971196  | South Africa | Other AHRI KZN study | Southern Africa | 11  | 10    | 2016 |
| 4       | 02_H0052B | SRR9971195  | South Africa | Other AHRI KZN study | Southern Africa | 19  | 12    | 2016 |
| 4       | 02_H0066B | SRR9971038  | South Africa | Other AHRI KZN study | Southern Africa | 29  | 3     | 2017 |
| 4       | 02_H0069B | SRR9971360  | South Africa | Other AHRI KZN study | Southern Africa | 21  | 4     | 2017 |
| 4       | 02_H0075B | SRR9971361  | South Africa | Other AHRI KZN study | Southern Africa | 24  | 5     | 2017 |
| 4       | 02_H0077B | SRR9971362  | South Africa | Other AHRI KZN study | Southern Africa | 24  | 5     | 2017 |
| 4       | 03_F1003B | SRR9971301  | South Africa | Other AHRI KZN study | Southern Africa | 22  | 6     | 2014 |
| 4       | 03_F1004B | SRR11349209 | South Africa | Other AHRI KZN study | Southern Africa | 20  | 6     | 2015 |
| 4       | 03_F1082B | SRR11349194 | South Africa | Other AHRI KZN study | Southern Africa | 25  | 1     | 2016 |
| 4       | 03_F1095B | SRR9971197  | South Africa | Other AHRI KZN study | Southern Africa | 22  | 2     | 2016 |
| 4       | 03_F1100B | SRR9971200  | South Africa | Other AHRI KZN study | Southern Africa | 29  | 2     | 2016 |
| 4       | 03_F1124B | SRR9971199  | South Africa | Other AHRI KZN study | Southern Africa | 25  | 5     | 2016 |
| 4       | 03_F1139B | SRR11349193 | South Africa | Other AHRI KZN study | Southern Africa | 11  | 7     | 2016 |
| 4       | 03_F1141B | SRR9971201  | South Africa | Other AHRI KZN study | Southern Africa | 20  | 7     | 2016 |
| 4       | 03_F1143B | SRR11349192 | South Africa | Other AHRI KZN study | Southern Africa | 20  | 7     | 2016 |
| 4       | 03_H0085B | SRR9971363  | South Africa | Other AHRI KZN study | Southern Africa | 21  | 6     | 2017 |
| 4       | 03_H0104B | SRR9971364  | South Africa | Other AHRI KZN study | Southern Africa | 21  | 9     | 2017 |
| 4       | 03_P00056 | SRR9971365  | South Africa | PRAXIS (this study)  | Southern Africa | 10  | 7     | 2017 |
| 4       | 03_P0005B | SRR9971366  | South Africa | PRAXIS (this study)  | Southern Africa | 23  | 1     | 2017 |
| 4       | 03_P0017B | SRR9971367  | South Africa | PRAXIS (this study)  | Southern Africa | 7   | 2     | 2017 |
| 4       | 03_P0051B | SRR9971368  | South Africa | PRAXIS (this study)  | Southern Africa | 30  | 5     | 2017 |
| 4       | 03_P0061B | SRR9971369  | South Africa | PRAXIS (this study)  | Southern Africa | 8   | 6     | 2017 |
| 4       | 03_P0078B | SRR9971186  | South Africa | PRAXIS (this study)  | Southern Africa | 11  | 7     | 2017 |
| 4       | 03_P0080B | SRR9971345  | South Africa | PRAXIS (this study)  | Southern Africa | 10  | 7     | 2017 |
| 4       | 03_P0081B | SRR9971188  | South Africa | PRAXIS (this study)  | Southern Africa | 12  | 7     | 2017 |
| 4       | 03_P0090B | SRR9971187  | South Africa | PRAXIS (this study)  | Southern Africa | 1   | 8     | 2017 |
| 4       | 03_P0106B | SRR9971190  | South Africa | PRAXIS (this study)  | Southern Africa | 30  | 8     | 2017 |
| 4       | 03_P0117B | SRR9971189  | South Africa | PRAXIS (this study)  | Southern Africa | 21  | 9     | 2017 |
| 4       | 04_H0102B | SRR9971192  | South Africa | Other AHRI KZN study | Southern Africa | 7   | 9     | 2017 |
| 4       | 04_H0109B | SRR9971191  | South Africa | Other AHRI KZN study | Southern Africa | 11  | 10    | 2017 |
| 4       | 04_H0110B | SRR9971194  | South Africa | Other AHRI KZN study | Southern Africa | 24  | 10    | 2017 |
| 4       | 04_P00276 | SRR9971193  | South Africa | PRAXIS (this study)  | Southern Africa | 18  | 8     | 2017 |
| 4       | 04_P0097B | SRR11349191 | South Africa | PRAXIS (this study)  | Southern Africa | 16  | 8     | 2017 |
| 4       | 04_P0098B | SRR9971056  | South Africa | PRAXIS (this study)  | Southern Africa | 21  | 8     | 2017 |
| 4       | 04_P0101B | SRR9970995  | South Africa | PRAXIS (this study)  | Southern Africa | 22  | 8     | 2017 |
| 4       | 04_P0119B | SRR9970996  | South Africa | PRAXIS (this study)  | Southern Africa | 22  | 9     | 2017 |
| 4       | 04_P0121B | SRR9971057  | South Africa | PRAXIS (this study)  | Southern Africa | 27  | 9     | 2017 |
| 4       | 04_P0133B | SRR9970994  | South Africa | PRAXIS (this study)  | Southern Africa | 5   | 10    | 2017 |
| 4       | 04_P0139B | SRR9970999  | South Africa | PRAXIS (this study)  | Southern Africa | 16  | 10    | 2017 |
| 4       | 04_P0141B | SRR9971000  | South Africa | PRAXIS (this study)  | Southern Africa | 18  | 10    | 2017 |
| 4       | 04_P0152B | SRR9970997  | South Africa | PRAXIS (this study)  | Southern Africa | 31  | 10    | 2017 |
| 4       | 04_P0156B | SRR9970998  | South Africa | PRAXIS (this study)  | Southern Africa | 31  | 10    | 2017 |

|   |           |             |              |                      |                 |    |    |      |
|---|-----------|-------------|--------------|----------------------|-----------------|----|----|------|
| 4 | 04_R0003B | SRR9971168  | South Africa | Other AHRI KZN study | Southern Africa | 1  | 2  | 2017 |
| 4 | 04_R0005B | SRR9971167  | South Africa | Other AHRI KZN study | Southern Africa | 3  | 2  | 2017 |
| 4 | 04_R0041B | SRR9971162  | South Africa | Other AHRI KZN study | Southern Africa | 4  | 5  | 2017 |
| 4 | 04_R0051B | SRR9971161  | South Africa | Other AHRI KZN study | Southern Africa | 30 | 5  | 2017 |
| 4 | 04_R0052B | SRR9971160  | South Africa | Other AHRI KZN study | Southern Africa | 5  | 6  | 2017 |
| 4 | 05_H0015B | SRR9971125  | South Africa | Other AHRI KZN study | Southern Africa | 4  | 5  | 2016 |
| 4 | 05_H0033B | SRR9971130  | South Africa | Other AHRI KZN study | Southern Africa | 15 | 9  | 2016 |
| 4 | 05_H0079B | SRR9971150  | South Africa | Other AHRI KZN study | Southern Africa | 26 | 5  | 2017 |
| 4 | 05_H0115B | SRR9971319  | South Africa | Other AHRI KZN study | Southern Africa | 23 | 11 | 2017 |
| 4 | 05_P0002B | SRR9971131  | South Africa | PRAXIS (this study)  | Southern Africa | 13 | 12 | 2016 |
| 4 | 05_P0044B | SRR9971315  | South Africa | PRAXIS (this study)  | Southern Africa | 19 | 5  | 2017 |
| 4 | 05_R0062B | SRR9971071  | South Africa | Other AHRI KZN study | Southern Africa | 7  | 7  | 2017 |
| 4 | 05_R0071B | SRR9971069  | South Africa | Other AHRI KZN study | Southern Africa | 15 | 8  | 2017 |
| 4 | 05_R0073B | SRR9971388  | South Africa | Other AHRI KZN study | Southern Africa | 21 | 8  | 2017 |
| 4 | 05_R0077B | SRR9971389  | South Africa | Other AHRI KZN study | Southern Africa | 30 | 8  | 2017 |
| 4 | 05_R0081B | SRR9971384  | South Africa | Other AHRI KZN study | Southern Africa | 19 | 9  | 2017 |
| 4 | 05_R0083B | SRR9971385  | South Africa | Other AHRI KZN study | Southern Africa | 21 | 9  | 2017 |
| 4 | 05_R0084B | SRR9971386  | South Africa | Other AHRI KZN study | Southern Africa | 28 | 9  | 2017 |
| 4 | 05_R0085B | SRR9971387  | South Africa | Other AHRI KZN study | Southern Africa | 3  | 10 | 2017 |
| 4 | 05_R0086B | SRR9971380  | South Africa | Other AHRI KZN study | Southern Africa | 4  | 10 | 2017 |
| 4 | 05_R0088B | SRR9971381  | South Africa | Other AHRI KZN study | Southern Africa | 18 | 10 | 2017 |
| 4 | 05_R0093B | SRR9971382  | South Africa | Other AHRI KZN study | Southern Africa | 30 | 10 | 2017 |
| 4 | 05_R0097B | SRR9971383  | South Africa | Other AHRI KZN study | Southern Africa | 3  | 11 | 2017 |
| 4 | 06_H0028B | SRR9971132  | South Africa | Other AHRI KZN study | Southern Africa | 24 | 8  | 2016 |
| 4 | 06_H0034B | SRR9971133  | South Africa | Other AHRI KZN study | Southern Africa | 15 | 9  | 2016 |
| 4 | 06_H0061B | SRR9971245  | South Africa | Other AHRI KZN study | Southern Africa | 3  | 3  | 2017 |
| 4 | 06_H0078B | SRR9971244  | South Africa | Other AHRI KZN study | Southern Africa | 26 | 5  | 2017 |
| 4 | 06_L00101 | SRR9971126  | South Africa | Other AHRI KZN study | Southern Africa | 28 | 1  | 2016 |
| 4 | 06_L00103 | SRR9971241  | South Africa | Other AHRI KZN study | Southern Africa | 14 | 8  | 2017 |
| 4 | 06_L00201 | SRR9971127  | South Africa | Other AHRI KZN study | Southern Africa | 23 | 11 | 2016 |
| 4 | 06_L00301 | SRR9971128  | South Africa | Other AHRI KZN study | Southern Africa | 28 | 11 | 2016 |
| 4 | 06_L00701 | SRR9971240  | South Africa | Other AHRI KZN study | Southern Africa | 19 | 4  | 2017 |
| 4 | 06_L00901 | SRR9971243  | South Africa | Other AHRI KZN study | Southern Africa | 17 | 5  | 2017 |
| 4 | 06_P0027B | SRR9971242  | South Africa | PRAXIS (this study)  | Southern Africa | 24 | 2  | 2017 |
| 4 | 06_P0060B | SRR9971237  | South Africa | PRAXIS (this study)  | Southern Africa | 8  | 6  | 2017 |
| 4 | 06_P0062B | SRR9971236  | South Africa | PRAXIS (this study)  | Southern Africa | 8  | 6  | 2017 |
| 4 | 07_H0009B | SRR9971129  | South Africa | Other AHRI KZN study | Southern Africa | 3  | 1  | 2016 |
| 4 | 07_H0011B | SRR9971274  | South Africa | Other AHRI KZN study | Southern Africa | 3  | 7  | 2016 |
| 4 | 07_H0091B | SRR9971239  | South Africa | Other AHRI KZN study | Southern Africa | 7  | 12 | 2017 |
| 4 | 07_H0092B | SRR9971238  | South Africa | Other AHRI KZN study | Southern Africa | 19 | 7  | 2017 |
| 4 | 07_H0093B | SRR9971251  | South Africa | Other AHRI KZN study | Southern Africa | 19 | 7  | 2017 |
| 4 | 07_K0006B | SRR9971252  | South Africa | Other AHRI KZN study | Southern Africa | 24 | 10 | 2017 |
| 4 | 07_K0008B | SRR9971185  | South Africa | Other AHRI KZN study | Southern Africa | 2  | 11 | 2017 |
| 4 | 07_L00102 | SRR9971250  | South Africa | Other AHRI KZN study | Southern Africa | 19 | 1  | 2017 |
| 4 | 07_P0004B | SRR9971183  | South Africa | PRAXIS (this study)  | Southern Africa | 19 | 1  | 2017 |
| 4 | 07_P0126B | SRR9971184  | South Africa | PRAXIS (this study)  | Southern Africa | 29 | 9  | 2017 |
| 4 | 08_H0116B | SRR9971181  | South Africa | Other AHRI KZN study | Southern Africa | 27 | 11 | 2017 |
| 4 | 08_K0028B | SRR9971027  | South Africa | Other AHRI KZN study | Southern Africa | 22 | 2  | 2018 |
| 4 | 08_P0147B | SRR9971182  | South Africa | PRAXIS (this study)  | Southern Africa | 26 | 10 | 2017 |
| 4 | 08_P01501 | SRR9971179  | South Africa | PRAXIS (this study)  | Southern Africa | 27 | 11 | 2017 |
| 4 | 08_P01502 | SRR9971180  | South Africa | PRAXIS (this study)  | Southern Africa | 18 | 12 | 2017 |
| 4 | 08_P0150B | SRR9971285  | South Africa | PRAXIS (this study)  | Southern Africa | 30 | 10 | 2017 |
| 4 | 08_P0161B | SRR9971284  | South Africa | PRAXIS (this study)  | Southern Africa | 20 | 11 | 2017 |
| 4 | 08_R0022B | SRR9971293  | South Africa | Other AHRI KZN study | Southern Africa | 23 | 3  | 2017 |
| 4 | 08_R0038B | SRR9971292  | South Africa | Other AHRI KZN study | Southern Africa | 28 | 4  | 2017 |
| 4 | 08_R0046B | SRR9971291  | South Africa | Other AHRI KZN study | Southern Africa | 17 | 5  | 2017 |
| 4 | 08_R0053B | SRR9971290  | South Africa | Other AHRI KZN study | Southern Africa | 8  | 6  | 2017 |
| 4 | 08_R0063B | SRR9971289  | South Africa | Other AHRI KZN study | Southern Africa | 12 | 7  | 2017 |
| 4 | 08_R0065B | SRR9971288  | South Africa | Other AHRI KZN study | Southern Africa | 20 | 7  | 2017 |
| 4 | 09_H0105B | SRR9971286  | South Africa | Other AHRI KZN study | Southern Africa | 21 | 9  | 2017 |
| 4 | 09_H0126B | SRR11349188 | South Africa | Other AHRI KZN study | Southern Africa | 6  | 2  | 2018 |

|   |           |             |              |                      |                 |    |    |      |
|---|-----------|-------------|--------------|----------------------|-----------------|----|----|------|
| 4 | 09_K0017B | SRR9971224  | South Africa | Other AHRI KZN study | Southern Africa | 18 | 1  | 2018 |
| 4 | 09_K0022B | SRR9971341  | South Africa | Other AHRI KZN study | Southern Africa | 1  | 2  | 2018 |
| 4 | 09_P00051 | SRR9971105  | South Africa | PRAXIS (this study)  | Southern Africa | 21 | 2  | 2017 |
| 4 | 09_P0014B | SRR9971106  | South Africa | PRAXIS (this study)  | Southern Africa | 1  | 2  | 2017 |
| 4 | 09_P0084B | SRR9971097  | South Africa | PRAXIS (this study)  | Southern Africa | 19 | 7  | 2017 |
| 4 | 09_R0079E | SRR11349185 | South Africa | Other AHRI KZN study | Southern Africa | 14 | 9  | 2017 |
| 4 | 10_H0094B | SRR9971100  | South Africa | Other AHRI KZN study | Southern Africa | 27 | 7  | 2017 |
| 4 | 10_H0132B | SRR9971342  | South Africa | Other AHRI KZN study | Southern Africa | 20 | 3  | 2018 |
| 4 | 10_H0140B | SRR9971343  | South Africa | Other AHRI KZN study | Southern Africa | 3  | 5  | 2018 |
| 4 | 10_P0023B | SRR9971101  | South Africa | PRAXIS (this study)  | Southern Africa | 17 | 2  | 2017 |
| 4 | 10_P0164B | SRR9971102  | South Africa | PRAXIS (this study)  | Southern Africa | 27 | 11 | 2017 |
| 4 | 10_P0191B | SRR9971344  | South Africa | PRAXIS (this study)  | Southern Africa | 8  | 2  | 2018 |
| 4 | 10_R0012B | SRR9971103  | South Africa | Other AHRI KZN study | Southern Africa | 24 | 2  | 2017 |
| 4 | 10_R0027B | SRR9971104  | South Africa | Other AHRI KZN study | Southern Africa | 31 | 3  | 2017 |
| 4 | 10_R0096E | SRR9971379  | South Africa | Other AHRI KZN study | Southern Africa | 3  | 11 | 2017 |
| 4 | 11_H0010B | SRR9971273  | South Africa | Other AHRI KZN study | Southern Africa | 3  | 3  | 2016 |
| 4 | 11_H0031B | SRR9971278  | South Africa | Other AHRI KZN study | Southern Africa | 29 | 8  | 2016 |
| 4 | 11_H0120B | SRR9971246  | South Africa | Other AHRI KZN study | Southern Africa | 15 | 1  | 2018 |
| 4 | 11_P0173B | SRR9971378  | South Africa | PRAXIS (this study)  | Southern Africa | 20 | 12 | 2017 |
| 4 | 11_P0190B | SRR9971070  | South Africa | PRAXIS (this study)  | Southern Africa | 7  | 2  | 2018 |
| 4 | 11_R0021B | SRR9970985  | South Africa | Other AHRI KZN study | Southern Africa | 17 | 3  | 2017 |
| 4 | 12_H0131B | SRR9971178  | South Africa | Other AHRI KZN study | Southern Africa | 7  | 3  | 2018 |
| 4 | 12_H0137B | SRR9971177  | South Africa | Other AHRI KZN study | Southern Africa | 16 | 4  | 2018 |
| 4 | 12_H0145B | SRR9971174  | South Africa | Other AHRI KZN study | Southern Africa | 31 | 5  | 2018 |
| 4 | 12_H0146B | SRR9971173  | South Africa | Other AHRI KZN study | Southern Africa | 31 | 5  | 2018 |
| 4 | 12_H0147B | SRR9971176  | South Africa | Other AHRI KZN study | Southern Africa | 31 | 5  | 2018 |
| 4 | 12_H0148B | SRR9971175  | South Africa | Other AHRI KZN study | Southern Africa | 6  | 6  | 2018 |
| 4 | 12_H0153B | SRR9971170  | South Africa | Other AHRI KZN study | Southern Africa | 26 | 6  | 2018 |
| 4 | 12_H0154B | SRR9971169  | South Africa | Other AHRI KZN study | Southern Africa | 5  | 7  | 2018 |
| 4 | 12_K0011B | SRR9971172  | South Africa | Other AHRI KZN study | Southern Africa | 4  | 1  | 2018 |
| 4 | 12_P3002B | SRR9971171  | South Africa | PRAXIS (this study)  | Southern Africa | 16 | 5  | 2018 |
| 4 | 12_P3409B | SRR9971233  | South Africa | PRAXIS (this study)  | Southern Africa | 27 | 6  | 2018 |
| 4 | 12_R0014B | SRR9970984  | South Africa | Other AHRI KZN study | Southern Africa | 6  | 3  | 2017 |
| 4 | 13_H0142B | SRR9971234  | South Africa | Other AHRI KZN study | Southern Africa | 24 | 5  | 2018 |
| 4 | 13_K0041B | SRR11349174 | South Africa | Other AHRI KZN study | Southern Africa | 11 | 4  | 2018 |
| 4 | 13_K0054B | SRR9971232  | South Africa | Other AHRI KZN study | Southern Africa | 31 | 5  | 2018 |
| 4 | 13_K0058B | SRR9971229  | South Africa | Other AHRI KZN study | Southern Africa | 15 | 6  | 2018 |
| 4 | 13_K0059B | SRR9971230  | South Africa | Other AHRI KZN study | Southern Africa | 19 | 6  | 2018 |
| 4 | 13_P3503B | SRR9971227  | South Africa | PRAXIS (this study)  | Southern Africa | 18 | 5  | 2018 |
| 4 | 13_P3505B | SRR9971228  | South Africa | PRAXIS (this study)  | Southern Africa | 4  | 6  | 2018 |
| 4 | 14_H0158B | SRR9971225  | South Africa | Other AHRI KZN study | Southern Africa | 27 | 7  | 2018 |
| 4 | 14_H0160B | SRR9971226  | South Africa | Other AHRI KZN study | Southern Africa | 8  | 8  | 2018 |
| 4 | 14_K0049B | SRR9971096  | South Africa | Other AHRI KZN study | Southern Africa | 18 | 5  | 2018 |
| 4 | 14_P3016B | SRR9971095  | South Africa | PRAXIS (this study)  | Southern Africa | 3  | 8  | 2018 |
| 4 | 15_H0149B | SRR9971090  | South Africa | Other AHRI KZN study | Southern Africa | 12 | 6  | 2018 |
| 4 | 15_P3507B | SRR9971153  | South Africa | PRAXIS (this study)  | Southern Africa | 6  | 6  | 2018 |
| 4 | 16_P0001B | SRR9970983  | South Africa | PRAXIS (this study)  | Southern Africa | 17 | 1  | 2017 |
| 4 | 16_R0004B | SRR11349157 | South Africa | Other AHRI KZN study | Southern Africa | 1  | 2  | 2017 |
| 4 | 16_R0024B | SRR9970980  | South Africa | Other AHRI KZN study | Southern Africa | 24 | 3  | 2017 |
| 4 | 16_R0029B | SRR9970979  | South Africa | Other AHRI KZN study | Southern Africa | 4  | 4  | 2017 |
| 4 | 16_R0031B | SRR9970978  | South Africa | Other AHRI KZN study | Southern Africa | 11 | 4  | 2017 |
| 4 | 16_R0039B | SRR9971026  | South Africa | Other AHRI KZN study | Southern Africa | 28 | 4  | 2017 |
| 4 | 21_H0164B | SRR9971152  | South Africa | Other AHRI KZN study | Southern Africa | 24 | 8  | 2018 |
| 4 | 21_H0165B | SRR9971151  | South Africa | Other AHRI KZN study | Southern Africa | 29 | 8  | 2018 |
| 4 | 21_H0167B | SRR9971094  | South Africa | Other AHRI KZN study | Southern Africa | 4  | 9  | 2018 |
| 4 | 21_H0169B | SRR9971093  | South Africa | Other AHRI KZN study | Southern Africa | 20 | 9  | 2018 |
| 4 | 21_K0029B | SRR9971092  | South Africa | Other AHRI KZN study | Southern Africa | 27 | 2  | 2018 |
| 4 | 21_K0030B | SRR9971091  | South Africa | Other AHRI KZN study | Southern Africa | 1  | 3  | 2018 |
| 4 | 21_K0031B | SRR9971370  | South Africa | Other AHRI KZN study | Southern Africa | 8  | 3  | 2018 |
| 4 | 21_K0044B | SRR9971371  | South Africa | Other AHRI KZN study | Southern Africa | 8  | 5  | 2018 |
| 4 | 21_K0046B | SRR9971376  | South Africa | Other AHRI KZN study | Southern Africa | 8  | 5  | 2018 |

|   |            |            |              |                      |                 |    |    |      |
|---|------------|------------|--------------|----------------------|-----------------|----|----|------|
| 4 | 21_K0051B  | SRR9971377 | South Africa | Other AHRI KZN study | Southern Africa | 22 | 5  | 2018 |
| 4 | 21_K0066B  | SRR9971282 | South Africa | Other AHRI KZN study | Southern Africa | 24 | 7  | 2018 |
| 4 | 21_K0073B  | SRR9971283 | South Africa | Other AHRI KZN study | Southern Africa | 29 | 8  | 2018 |
| 4 | 21_P3021B  | SRR9971067 | South Africa | PRAXIS (this study)  | Southern Africa | 3  | 9  | 2018 |
| 4 | 21_P3028B  | SRR9971373 | South Africa | PRAXIS (this study)  | Southern Africa | 4  | 10 | 2018 |
| 4 | 21_P3516B  | SRR9971374 | South Africa | PRAXIS (this study)  | Southern Africa | 10 | 8  | 2018 |
| 4 | 21_P3519B  | SRR9971375 | South Africa | PRAXIS (this study)  | Southern Africa | 16 | 8  | 2018 |
| 4 | 21_P3521B  | SRR9971281 | South Africa | PRAXIS (this study)  | Southern Africa | 29 | 8  | 2018 |
| 4 | 21_P3532B  | SRR9971275 | South Africa | PRAXIS (this study)  | Southern Africa | 4  | 10 | 2018 |
| 4 | 22_H0174B  | SRR9971348 | South Africa | Other AHRI KZN study | Southern Africa | 23 | 10 | 2018 |
| 4 | 22_K0043B  | SRR9971347 | South Africa | Other AHRI KZN study | Southern Africa | 24 | 4  | 2018 |
| 4 | 22_K0047B  | SRR9971049 | South Africa | Other AHRI KZN study | Southern Africa | 11 | 5  | 2018 |
| 4 | 22_K0075B  | SRR9971048 | South Africa | Other AHRI KZN study | Southern Africa | 7  | 9  | 2018 |
| 4 | 22_K0076B  | SRR9971051 | South Africa | Other AHRI KZN study | Southern Africa | 17 | 9  | 2018 |
| 4 | 22_P3026B  | SRR9971050 | South Africa | PRAXIS (this study)  | Southern Africa | 17 | 9  | 2018 |
| 4 | 22_P3027B  | SRR9971053 | South Africa | PRAXIS (this study)  | Southern Africa | 27 | 9  | 2018 |
| 4 | 22_P3032B  | SRR9971052 | South Africa | PRAXIS (this study)  | Southern Africa | 25 | 10 | 2018 |
| 4 | 22_P3417B  | SRR9971331 | South Africa | PRAXIS (this study)  | Southern Africa | 17 | 9  | 2018 |
| 4 | 22_P3527B  | SRR9971332 | South Africa | PRAXIS (this study)  | Southern Africa | 13 | 9  | 2018 |
| 4 | 22_P3529B  | SRR9971335 | South Africa | PRAXIS (this study)  | Southern Africa | 27 | 9  | 2018 |
| 4 | 22_P3530B  | SRR9971336 | South Africa | PRAXIS (this study)  | Southern Africa | 3  | 10 | 2018 |
| 4 | 23_H0176B  | SRR9971333 | South Africa | Other AHRI KZN study | Southern Africa | 8  | 11 | 2018 |
| 4 | 23_H0181B  | SRR9971334 | South Africa | Other AHRI KZN study | Southern Africa | 22 | 11 | 2018 |
| 4 | 23_H0182B  | SRR9971339 | South Africa | Other AHRI KZN study | Southern Africa | 29 | 11 | 2018 |
| 4 | 23_H0187B  | SRR9971340 | South Africa | Other AHRI KZN study | Southern Africa | 12 | 6  | 2018 |
| 4 | 23_K0015B  | SRR9971337 | South Africa | Other AHRI KZN study | Southern Africa | 11 | 1  | 2018 |
| 4 | 23_K0080B  | SRR9971338 | South Africa | Other AHRI KZN study | Southern Africa | 2  | 10 | 2018 |
| 4 | 23_K0091B  | SRR9971123 | South Africa | Other AHRI KZN study | Southern Africa | 6  | 11 | 2018 |
| 4 | 23_K0093B  | SRR9971122 | South Africa | Other AHRI KZN study | Southern Africa | 9  | 11 | 2018 |
| 4 | 23_K0094B  | SRR9970993 | South Africa | Other AHRI KZN study | Southern Africa | 14 | 11 | 2018 |
| 4 | 23_K0095B  | SRR9970992 | South Africa | Other AHRI KZN study | Southern Africa | 19 | 11 | 2018 |
| 4 | 23_K0098B  | SRR9970991 | South Africa | Other AHRI KZN study | Southern Africa | 22 | 11 | 2018 |
| 4 | 23_K0101B  | SRR9971165 | South Africa | Other AHRI KZN study | Southern Africa | 17 | 1  | 2019 |
| 4 | 23_KF091B  | SRR9970990 | South Africa | Other AHRI KZN study | Southern Africa | 6  | 11 | 2018 |
| 4 | 23_KG091B  | SRR9970989 | South Africa | Other AHRI KZN study | Southern Africa | 6  | 11 | 2018 |
| 4 | 23_P3424B  | SRR9970988 | South Africa | PRAXIS (this study)  | Southern Africa | 16 | 11 | 2018 |
| 4 | 23_P3425B  | SRR9971164 | South Africa | PRAXIS (this study)  | Southern Africa | 22 | 1  | 2019 |
| 4 | 23_P3535B  | SRR9970987 | South Africa | PRAXIS (this study)  | Southern Africa | 23 | 10 | 2018 |
| 4 | 24_K0081B  | SRR9970986 | South Africa | Other AHRI KZN study | Southern Africa | 4  | 10 | 2018 |
| 4 | 24_K0082B  | SRR9971086 | South Africa | Other AHRI KZN study | Southern Africa | 8  | 10 | 2018 |
| 4 | 24_K0086B  | SRR9971084 | South Africa | Other AHRI KZN study | Southern Africa | 19 | 10 | 2018 |
| 4 | 24_K0088B  | SRR9971068 | South Africa | Other AHRI KZN study | Southern Africa | 25 | 10 | 2018 |
| 4 | 24_K0089B  | SRR9971066 | South Africa | Other AHRI KZN study | Southern Africa | 26 | 10 | 2018 |
| 4 | 24_K0097B  | SRR9971063 | South Africa | Other AHRI KZN study | Southern Africa | 22 | 11 | 2018 |
| 4 | 24_K0100B  | SRR9971163 | South Africa | Other AHRI KZN study | Southern Africa | 17 | 1  | 2019 |
| 4 | 24_P3038B  | SRR9971159 | South Africa | PRAXIS (this study)  | Southern Africa | 3  | 12 | 2018 |
| 4 | 25_P35056  | SRR9971166 | South Africa | PRAXIS (this study)  | Southern Africa | 16 | 1  | 2019 |
| 4 | ERR1633775 | ERR1633775 | South Africa | Publicly available   | Southern Africa | 1  | 7  | 2010 |
| 4 | ERR1633776 | ERR1633776 | South Africa | Publicly available   | Southern Africa | 1  | 7  | 2010 |
| 4 | ERR1633778 | ERR1633778 | South Africa | Publicly available   | Southern Africa | 1  | 7  | 2010 |
| 4 | ERR1633779 | ERR1633779 | South Africa | Publicly available   | Southern Africa | 1  | 7  | 2010 |
| 4 | ERR1633780 | ERR1633780 | South Africa | Publicly available   | Southern Africa | 1  | 7  | 2010 |
| 4 | ERR1633784 | ERR1633784 | South Africa | Publicly available   | Southern Africa | 1  | 7  | 2010 |
| 4 | ERR1633785 | ERR1633785 | South Africa | Publicly available   | Southern Africa | 1  | 7  | 2010 |
| 4 | ERR1633786 | ERR1633786 | South Africa | Publicly available   | Southern Africa | 1  | 7  | 2010 |
| 4 | ERR1633788 | ERR1633788 | South Africa | Publicly available   | Southern Africa | 1  | 7  | 2010 |
| 4 | ERR1633790 | ERR1633790 | South Africa | Publicly available   | Southern Africa | 1  | 7  | 2010 |
| 4 | ERR1633794 | ERR1633794 | South Africa | Publicly available   | Southern Africa | 1  | 7  | 2010 |
| 4 | ERR1633795 | ERR1633795 | South Africa | Publicly available   | Southern Africa | 1  | 7  | 2010 |
| 4 | ERR1633798 | ERR1633798 | South Africa | Publicly available   | Southern Africa | 1  | 7  | 2010 |
| 4 | ERR1633801 | ERR1633801 | South Africa | Publicly available   | Southern Africa | 1  | 7  | 2010 |







|   |           |             |              |                    |                 |    |    |      |
|---|-----------|-------------|--------------|--------------------|-----------------|----|----|------|
| 4 | ERR245724 | ERR245724   | Malawi       | Publicly available | Southern Africa | 1  | 7  | 2005 |
| 4 | ERR245725 | ERR245725   | Malawi       | Publicly available | Southern Africa | 1  | 7  | 2007 |
| 4 | ERR245729 | ERR245729   | Malawi       | Publicly available | Southern Africa | 1  | 7  | 2007 |
| 4 | ERR245730 | ERR245730   | Malawi       | Publicly available | Southern Africa | 1  | 7  | 2007 |
| 4 | ERR245731 | ERR245731   | Malawi       | Publicly available | Southern Africa | 1  | 7  | 2007 |
| 4 | ERR245733 | ERR245733   | Malawi       | Publicly available | Southern Africa | 1  | 7  | 2007 |
| 4 | ERR245736 | ERR245736   | Malawi       | Publicly available | Southern Africa | 1  | 7  | 2007 |
| 4 | ERR245737 | ERR245737   | Malawi       | Publicly available | Southern Africa | 1  | 7  | 2007 |
| 4 | ERR245738 | ERR245738   | Malawi       | Publicly available | Southern Africa | 1  | 7  | 2007 |
| 4 | ERR245740 | ERR245740   | Malawi       | Publicly available | Southern Africa | 1  | 7  | 2007 |
| 4 | ERR245741 | ERR245741   | Malawi       | Publicly available | Southern Africa | 1  | 7  | 2008 |
| 4 | ERR245743 | ERR245743   | Malawi       | Publicly available | Southern Africa | 1  | 7  | 1997 |
| 4 | ERR245744 | ERR245744   | Malawi       | Publicly available | Southern Africa | 1  | 7  | 1997 |
| 4 | ERR245745 | ERR245745   | Malawi       | Publicly available | Southern Africa | 1  | 7  | 1997 |
| 4 | ERR245746 | ERR245746   | Malawi       | Publicly available | Southern Africa | 1  | 7  | 1997 |
| 4 | ERR245749 | ERR245749   | Malawi       | Publicly available | Southern Africa | 1  | 7  | 1999 |
| 4 | ERR245750 | ERR245750   | Malawi       | Publicly available | Southern Africa | 1  | 7  | 1999 |
| 4 | ERR245752 | ERR245752   | Malawi       | Publicly available | Southern Africa | 1  | 7  | 2000 |
| 4 | ERR245755 | ERR245755   | Malawi       | Publicly available | Southern Africa | 1  | 7  | 2000 |
| 4 | ERR245756 | ERR245756   | Malawi       | Publicly available | Southern Africa | 1  | 7  | 2000 |
| 4 | ERR245758 | ERR245758   | Malawi       | Publicly available | Southern Africa | 1  | 7  | 2000 |
| 4 | ERR245759 | ERR245759   | Malawi       | Publicly available | Southern Africa | 1  | 7  | 2000 |
| 4 | ERR550741 | ERR550741   | eSwatini     | Publicly available | Southern Africa | 1  | 7  | 2011 |
| 4 | ERR550861 | ERR550861   | eSwatini     | Publicly available | Southern Africa | 1  | 7  | 2011 |
| 4 | ERR551014 | ERR551014   | eSwatini     | Publicly available | Southern Africa | 1  | 7  | 2012 |
| 4 | ERR551280 | ERR551280   | eSwatini     | Publicly available | Southern Africa | 1  | 7  | 2012 |
| 4 | ERR551536 | ERR551536   | eSwatini     | Publicly available | Southern Africa | 1  | 7  | 2012 |
| 4 | ERR551969 | ERR551969   | eSwatini     | Publicly available | Southern Africa | 1  | 7  | 2009 |
| 4 | ERR552070 | ERR552070   | eSwatini     | Publicly available | Southern Africa | 1  | 7  | 2012 |
| 4 | ERR552124 | ERR552124   | eSwatini     | Publicly available | Southern Africa | 1  | 7  | 2012 |
| 4 | ERR552150 | ERR552150   | eSwatini     | Publicly available | Southern Africa | 1  | 7  | 2009 |
| 4 | ERR552193 | ERR552193   | eSwatini     | Publicly available | Southern Africa | 1  | 7  | 2009 |
| 4 | ERR552405 | ERR552405   | eSwatini     | Publicly available | Southern Africa | 1  | 7  | 2009 |
| 4 | ERR552484 | ERR552484   | eSwatini     | Publicly available | Southern Africa | 1  | 7  | 2009 |
| 4 | ERR552491 | ERR552491   | eSwatini     | Publicly available | Southern Africa | 1  | 7  | 2010 |
| 4 | ERR552496 | ERR552496   | eSwatini     | Publicly available | Southern Africa | 1  | 7  | 2009 |
| 4 | ERR552540 | ERR552540   | eSwatini     | Publicly available | Southern Africa | 1  | 7  | 2009 |
| 4 | ERR552572 | ERR552572   | eSwatini     | Publicly available | Southern Africa | 1  | 7  | 2009 |
| 4 | ERR552612 | ERR552612   | eSwatini     | Publicly available | Southern Africa | 1  | 7  | 2009 |
| 4 | ERR552745 | ERR552745   | eSwatini     | Publicly available | Southern Africa | 1  | 7  | 2009 |
| 4 | ERR552754 | ERR552754   | eSwatini     | Publicly available | Southern Africa | 1  | 7  | 2010 |
| 4 | ERR552764 | ERR552764   | eSwatini     | Publicly available | Southern Africa | 1  | 7  | 2009 |
| 4 | ERR553221 | ERR553221   | eSwatini     | Publicly available | Southern Africa | 1  | 7  | 2009 |
| 4 | ERR553230 | ERR553230   | eSwatini     | Publicly available | Southern Africa | 1  | 7  | 2009 |
| 4 | ERR553242 | ERR553242   | eSwatini     | Publicly available | Southern Africa | 1  | 7  | 2009 |
| 4 | ERR553357 | ERR553357   | eSwatini     | Publicly available | Southern Africa | 1  | 7  | 2010 |
| 4 | KR_F1002B | SRR9971296  | South Africa | Publicly available | Southern Africa | 22 | 6  | 2015 |
| 4 | KR_F1013B | SRR11349134 | South Africa | Publicly available | Southern Africa | 17 | 8  | 2015 |
| 4 | KR_F1016B | SRR11349133 | South Africa | Publicly available | Southern Africa | 17 | 8  | 2015 |
| 4 | KR_F1019B | SRR9971312  | South Africa | Publicly available | Southern Africa | 24 | 8  | 2015 |
| 4 | KR_F1053B | SRR9971014  | South Africa | Publicly available | Southern Africa | 9  | 11 | 2015 |
| 4 | KR_F1057B | SRR9971003  | South Africa | Publicly available | Southern Africa | 16 | 11 | 2015 |
| 4 | KR_F1062B | SRR11349206 | South Africa | Publicly available | Southern Africa | 30 | 11 | 2015 |
| 4 | KR_F1070B | SRR11349203 | South Africa | Publicly available | Southern Africa | 21 | 12 | 2015 |
| 4 | KR_F1074B | SRR11349202 | South Africa | Publicly available | Southern Africa | 11 | 1  | 2016 |
| 4 | KR_F1075B | SRR9971276  | South Africa | Publicly available | Southern Africa | 11 | 1  | 2016 |
| 4 | KR_F1077B | SRR11349201 | South Africa | Publicly available | Southern Africa | 13 | 1  | 2016 |
| 4 | KR_F1079B | SRR11349200 | South Africa | Publicly available | Southern Africa | 18 | 1  | 2016 |
| 4 | KR_F1080B | SRR9971372  | South Africa | Publicly available | Southern Africa | 18 | 1  | 2016 |
| 4 | KR_F1085B | SRR9971280  | South Africa | Publicly available | Southern Africa | 27 | 1  | 2016 |
| 4 | KR_F1094B | SRR11349199 | South Africa | Publicly available | Southern Africa | 10 | 2  | 2016 |

|   |            |             |              |                    |                 |    |    |      |
|---|------------|-------------|--------------|--------------------|-----------------|----|----|------|
| 4 | KR_F1096B  | SRR9971047  | South Africa | Publicly available | Southern Africa | 22 | 2  | 2016 |
| 4 | KR_F1107B  | SRR9971046  | South Africa | Publicly available | Southern Africa | 9  | 3  | 2016 |
| 4 | KR_F1123B  | SRR11349198 | South Africa | Publicly available | Southern Africa | 23 | 5  | 2016 |
| 4 | SRR1011465 | SRR1011465  | South Africa | Publicly available | Southern Africa | 1  | 7  | 2013 |
| 4 | SRR1047971 | SRR1047971  | South Africa | Publicly available | Southern Africa | 1  | 7  | 1995 |
| 4 | SRR1140899 | SRR1140899  | South Africa | Publicly available | Southern Africa | 22 | 5  | 2013 |
| 4 | SRR1140924 | SRR1140924  | South Africa | Publicly available | Southern Africa | 15 | 4  | 2013 |
| 4 | SRR1140926 | SRR1140926  | South Africa | Publicly available | Southern Africa | 4  | 4  | 2013 |
| 4 | SRR1140927 | SRR1140927  | South Africa | Publicly available | Southern Africa | 30 | 1  | 2013 |
| 4 | SRR1140929 | SRR1140929  | South Africa | Publicly available | Southern Africa | 8  | 4  | 2013 |
| 4 | SRR1140930 | SRR1140930  | South Africa | Publicly available | Southern Africa | 10 | 5  | 2013 |
| 4 | SRR1140932 | SRR1140932  | South Africa | Publicly available | Southern Africa | 31 | 5  | 2013 |
| 4 | SRR1140934 | SRR1140934  | South Africa | Publicly available | Southern Africa | 22 | 5  | 2013 |
| 4 | SRR1140936 | SRR1140936  | South Africa | Publicly available | Southern Africa | 14 | 6  | 2013 |
| 4 | SRR1140938 | SRR1140938  | South Africa | Publicly available | Southern Africa | 10 | 4  | 2013 |
| 4 | SRR1140941 | SRR1140941  | South Africa | Publicly available | Southern Africa | 14 | 6  | 2013 |
| 4 | SRR1140944 | SRR1140944  | South Africa | Publicly available | Southern Africa | 31 | 5  | 2013 |
| 4 | SRR1140945 | SRR1140945  | South Africa | Publicly available | Southern Africa | 24 | 4  | 2013 |
| 4 | SRR1140946 | SRR1140946  | South Africa | Publicly available | Southern Africa | 27 | 3  | 2013 |
| 4 | SRR1140949 | SRR1140949  | South Africa | Publicly available | Southern Africa | 14 | 6  | 2013 |
| 4 | SRR1140951 | SRR1140951  | South Africa | Publicly available | Southern Africa | 5  | 4  | 2013 |
| 4 | SRR1140952 | SRR1140952  | South Africa | Publicly available | Southern Africa | 31 | 5  | 2013 |
| 4 | SRR1140953 | SRR1140953  | South Africa | Publicly available | Southern Africa | 27 | 3  | 2013 |
| 4 | SRR1140954 | SRR1140954  | South Africa | Publicly available | Southern Africa | 27 | 3  | 2013 |
| 4 | SRR1140955 | SRR1140955  | South Africa | Publicly available | Southern Africa | 4  | 4  | 2013 |
| 4 | SRR1140957 | SRR1140957  | South Africa | Publicly available | Southern Africa | 17 | 4  | 2013 |
| 4 | SRR1140958 | SRR1140958  | South Africa | Publicly available | Southern Africa | 4  | 2  | 2013 |
| 4 | SRR1140960 | SRR1140960  | South Africa | Publicly available | Southern Africa | 8  | 4  | 2013 |
| 4 | SRR1140962 | SRR1140962  | South Africa | Publicly available | Southern Africa | 25 | 3  | 2013 |
| 4 | SRR1140965 | SRR1140965  | South Africa | Publicly available | Southern Africa | 22 | 5  | 2013 |
| 4 | SRR1140966 | SRR1140966  | South Africa | Publicly available | Southern Africa | 6  | 4  | 2013 |
| 4 | SRR1172753 | SRR1172753  | South Africa | Publicly available | Southern Africa | 31 | 5  | 2013 |
| 4 | SRR1172793 | SRR1172793  | South Africa | Publicly available | Southern Africa | 6  | 8  | 2013 |
| 4 | SRR1172836 | SRR1172836  | South Africa | Publicly available | Southern Africa | 10 | 6  | 2013 |
| 4 | SRR1172888 | SRR1172888  | South Africa | Publicly available | Southern Africa | 13 | 3  | 2013 |
| 4 | SRR1172935 | SRR1172935  | South Africa | Publicly available | Southern Africa | 29 | 7  | 2013 |
| 4 | SRR1173101 | SRR1173101  | South Africa | Publicly available | Southern Africa | 17 | 5  | 2013 |
| 4 | SRR1173119 | SRR1173119  | South Africa | Publicly available | Southern Africa | 29 | 5  | 2013 |
| 4 | SRR1173167 | SRR1173167  | South Africa | Publicly available | Southern Africa | 12 | 6  | 2013 |
| 4 | SRR1173492 | SRR1173492  | South Africa | Publicly available | Southern Africa | 15 | 1  | 2013 |
| 4 | SRR1175028 | SRR1175028  | South Africa | Publicly available | Southern Africa | 11 | 12 | 2012 |
| 4 | SRR1175301 | SRR1175301  | South Africa | Publicly available | Southern Africa | 16 | 6  | 2013 |
| 4 | SRR1175303 | SRR1175303  | South Africa | Publicly available | Southern Africa | 23 | 4  | 2013 |
| 4 | SRR1175305 | SRR1175305  | South Africa | Publicly available | Southern Africa | 31 | 5  | 2013 |
| 4 | SRR1175307 | SRR1175307  | South Africa | Publicly available | Southern Africa | 26 | 7  | 2013 |
| 4 | SRR1175329 | SRR1175329  | South Africa | Publicly available | Southern Africa | 24 | 5  | 2013 |
| 4 | SRR1175354 | SRR1175354  | South Africa | Publicly available | Southern Africa | 23 | 7  | 2013 |
| 4 | SRR1180299 | SRR1180299  | South Africa | Publicly available | Southern Africa | 1  | 7  | 2013 |
| 4 | SRR1180349 | SRR1180349  | South Africa | Publicly available | Southern Africa | 27 | 8  | 2013 |
| 4 | SRR1180362 | SRR1180362  | South Africa | Publicly available | Southern Africa | 8  | 11 | 2012 |
| 4 | SRR1180364 | SRR1180364  | South Africa | Publicly available | Southern Africa | 15 | 7  | 2013 |
| 4 | SRR1180368 | SRR1180368  | South Africa | Publicly available | Southern Africa | 17 | 4  | 2013 |
| 4 | SRR1180369 | SRR1180369  | South Africa | Publicly available | Southern Africa | 5  | 8  | 2013 |
| 4 | SRR1180371 | SRR1180371  | South Africa | Publicly available | Southern Africa | 9  | 4  | 2013 |
| 4 | SRR1180372 | SRR1180372  | South Africa | Publicly available | Southern Africa | 30 | 4  | 2013 |
| 4 | SRR1180376 | SRR1180376  | South Africa | Publicly available | Southern Africa | 16 | 4  | 2013 |
| 4 | SRR1180379 | SRR1180379  | South Africa | Publicly available | Southern Africa | 5  | 8  | 2013 |
| 4 | SRR1180388 | SRR1180388  | South Africa | Publicly available | Southern Africa | 25 | 7  | 2013 |
| 4 | SRR1180392 | SRR1180392  | South Africa | Publicly available | Southern Africa | 29 | 5  | 2013 |
| 4 | SRR1180395 | SRR1180395  | South Africa | Publicly available | Southern Africa | 17 | 5  | 2013 |
| 4 | SRR1180402 | SRR1180402  | South Africa | Publicly available | Southern Africa | 3  | 4  | 2013 |

|   |            |            |              |                    |                 |    |   |      |
|---|------------|------------|--------------|--------------------|-----------------|----|---|------|
| 4 | SRR1180403 | SRR1180403 | South Africa | Publicly available | Southern Africa | 3  | 6 | 2013 |
| 4 | SRR1180407 | SRR1180407 | South Africa | Publicly available | Southern Africa | 30 | 7 | 2013 |
| 4 | SRR1180417 | SRR1180417 | South Africa | Publicly available | Southern Africa | 12 | 2 | 2013 |
| 4 | SRR1180419 | SRR1180419 | South Africa | Publicly available | Southern Africa | 18 | 7 | 2013 |
| 4 | SRR1180422 | SRR1180422 | South Africa | Publicly available | Southern Africa | 4  | 6 | 2013 |
| 4 | SRR1180424 | SRR1180424 | South Africa | Publicly available | Southern Africa | 15 | 1 | 2013 |
| 4 | SRR1180428 | SRR1180428 | South Africa | Publicly available | Southern Africa | 31 | 7 | 2013 |
| 4 | SRR1180429 | SRR1180429 | South Africa | Publicly available | Southern Africa | 21 | 5 | 2013 |
| 4 | SRR1180433 | SRR1180433 | South Africa | Publicly available | Southern Africa | 20 | 2 | 2013 |
| 4 | SRR1180436 | SRR1180436 | South Africa | Publicly available | Southern Africa | 19 | 7 | 2013 |
| 4 | SRR1180439 | SRR1180439 | South Africa | Publicly available | Southern Africa | 16 | 4 | 2013 |
| 4 | SRR1180443 | SRR1180443 | South Africa | Publicly available | Southern Africa | 30 | 1 | 2013 |
| 4 | SRR1180445 | SRR1180445 | South Africa | Publicly available | Southern Africa | 5  | 7 | 2013 |
| 4 | SRR1182981 | SRR1182981 | South Africa | Publicly available | Southern Africa | 9  | 4 | 2013 |
| 4 | SRR1182986 | SRR1182986 | South Africa | Publicly available | Southern Africa | 16 | 4 | 2013 |
| 4 | SRR1183000 | SRR1183000 | South Africa | Publicly available | Southern Africa | 15 | 1 | 2013 |
| 4 | SRR1183001 | SRR1183001 | South Africa | Publicly available | Southern Africa | 11 | 7 | 2013 |
| 4 | SRR1183008 | SRR1183008 | South Africa | Publicly available | Southern Africa | 11 | 7 | 2013 |
| 4 | SRR1183017 | SRR1183017 | South Africa | Publicly available | Southern Africa | 16 | 4 | 2013 |
| 4 | SRR1183035 | SRR1183035 | South Africa | Publicly available | Southern Africa | 10 | 5 | 2013 |
| 4 | SRR1183042 | SRR1183042 | South Africa | Publicly available | Southern Africa | 27 | 5 | 2013 |
| 4 | SRR1183043 | SRR1183043 | South Africa | Publicly available | Southern Africa | 23 | 7 | 2013 |
| 4 | SRR1183053 | SRR1183053 | South Africa | Publicly available | Southern Africa | 12 | 3 | 2013 |
| 4 | SRR1183066 | SRR1183066 | South Africa | Publicly available | Southern Africa | 21 | 8 | 2013 |
| 4 | SRR1183073 | SRR1183073 | South Africa | Publicly available | Southern Africa | 12 | 2 | 2013 |
| 4 | SRR1183074 | SRR1183074 | South Africa | Publicly available | Southern Africa | 20 | 2 | 2013 |
| 4 | SRR1183081 | SRR1183081 | South Africa | Publicly available | Southern Africa | 23 | 7 | 2013 |
| 4 | SRR1183090 | SRR1183090 | South Africa | Publicly available | Southern Africa | 23 | 5 | 2013 |
| 4 | SRR1183101 | SRR1183101 | South Africa | Publicly available | Southern Africa | 5  | 7 | 2013 |
| 4 | SRR1183119 | SRR1183119 | South Africa | Publicly available | Southern Africa | 13 | 3 | 2013 |
| 4 | SRR1183124 | SRR1183124 | South Africa | Publicly available | Southern Africa | 23 | 5 | 2013 |
| 4 | SRR1183125 | SRR1183125 | South Africa | Publicly available | Southern Africa | 4  | 7 | 2013 |
| 4 | SRR1183131 | SRR1183131 | South Africa | Publicly available | Southern Africa | 22 | 7 | 2013 |
| 4 | SRR1183146 | SRR1183146 | South Africa | Publicly available | Southern Africa | 18 | 7 | 2013 |
| 4 | SRR1184293 | SRR1184293 | South Africa | Publicly available | Southern Africa | 21 | 6 | 2013 |
| 4 | SRR1184295 | SRR1184295 | South Africa | Publicly available | Southern Africa | 15 | 7 | 2013 |
| 4 | SRR1184297 | SRR1184297 | South Africa | Publicly available | Southern Africa | 7  | 8 | 2013 |
| 4 | SRR1184298 | SRR1184298 | South Africa | Publicly available | Southern Africa | 12 | 7 | 2013 |
| 4 | SRR1184299 | SRR1184299 | South Africa | Publicly available | Southern Africa | 24 | 7 | 2013 |
| 4 | SRR1184300 | SRR1184300 | South Africa | Publicly available | Southern Africa | 19 | 8 | 2013 |
| 4 | SRR1184301 | SRR1184301 | South Africa | Publicly available | Southern Africa | 20 | 8 | 2013 |
| 4 | SRR1184304 | SRR1184304 | South Africa | Publicly available | Southern Africa | 31 | 5 | 2013 |
| 4 | SRR1184305 | SRR1184305 | South Africa | Publicly available | Southern Africa | 21 | 6 | 2013 |
| 4 | SRR1184306 | SRR1184306 | South Africa | Publicly available | Southern Africa | 29 | 7 | 2013 |
| 4 | SRR1184309 | SRR1184309 | South Africa | Publicly available | Southern Africa | 28 | 6 | 2013 |
| 4 | SRR1184310 | SRR1184310 | South Africa | Publicly available | Southern Africa | 18 | 7 | 2013 |
| 4 | SRR1184313 | SRR1184313 | South Africa | Publicly available | Southern Africa | 9  | 7 | 2013 |
| 4 | SRR1184314 | SRR1184314 | South Africa | Publicly available | Southern Africa | 11 | 7 | 2013 |
| 4 | SRR1184315 | SRR1184315 | South Africa | Publicly available | Southern Africa | 10 | 7 | 2013 |
| 4 | SRR1184316 | SRR1184316 | South Africa | Publicly available | Southern Africa | 7  | 8 | 2013 |
| 4 | SRR1184317 | SRR1184317 | South Africa | Publicly available | Southern Africa | 10 | 7 | 2013 |
| 4 | SRR1184319 | SRR1184319 | South Africa | Publicly available | Southern Africa | 24 | 7 | 2013 |
| 4 | SRR1184320 | SRR1184320 | South Africa | Publicly available | Southern Africa | 23 | 5 | 2013 |
| 4 | SRR1184321 | SRR1184321 | South Africa | Publicly available | Southern Africa | 31 | 7 | 2013 |
| 4 | SRR1184324 | SRR1184324 | South Africa | Publicly available | Southern Africa | 10 | 7 | 2013 |
| 4 | SRR1184325 | SRR1184325 | South Africa | Publicly available | Southern Africa | 19 | 6 | 2013 |
| 4 | SRR1184326 | SRR1184326 | South Africa | Publicly available | Southern Africa | 30 | 7 | 2013 |
| 4 | SRR1184327 | SRR1184327 | South Africa | Publicly available | Southern Africa | 8  | 8 | 2013 |
| 4 | SRR1184328 | SRR1184328 | South Africa | Publicly available | Southern Africa | 17 | 7 | 2013 |
| 4 | SRR1184331 | SRR1184331 | South Africa | Publicly available | Southern Africa | 12 | 7 | 2013 |
| 4 | SRR1184333 | SRR1184333 | South Africa | Publicly available | Southern Africa | 30 | 7 | 2013 |

|   |            |            |              |                    |                 |    |    |      |
|---|------------|------------|--------------|--------------------|-----------------|----|----|------|
| 4 | SRR1184334 | SRR1184334 | South Africa | Publicly available | Southern Africa | 23 | 8  | 2013 |
| 4 | SRR1184335 | SRR1184335 | South Africa | Publicly available | Southern Africa | 4  | 8  | 2013 |
| 4 | SRR1184336 | SRR1184336 | South Africa | Publicly available | Southern Africa | 24 | 7  | 2013 |
| 4 | SRR1184337 | SRR1184337 | South Africa | Publicly available | Southern Africa | 2  | 7  | 2013 |
| 4 | SRR1184339 | SRR1184339 | South Africa | Publicly available | Southern Africa | 10 | 6  | 2013 |
| 4 | SRR1184340 | SRR1184340 | South Africa | Publicly available | Southern Africa | 23 | 8  | 2013 |
| 4 | SRR1184341 | SRR1184341 | South Africa | Publicly available | Southern Africa | 11 | 7  | 2013 |
| 4 | SRR1184342 | SRR1184342 | South Africa | Publicly available | Southern Africa | 31 | 7  | 2013 |
| 4 | SRR1184345 | SRR1184345 | South Africa | Publicly available | Southern Africa | 19 | 6  | 2013 |
| 4 | SRR1184347 | SRR1184347 | South Africa | Publicly available | Southern Africa | 3  | 7  | 2013 |
| 4 | SRR1184348 | SRR1184348 | South Africa | Publicly available | Southern Africa | 12 | 6  | 2013 |
| 4 | SRR1184351 | SRR1184351 | South Africa | Publicly available | Southern Africa | 4  | 7  | 2013 |
| 4 | SRR1184352 | SRR1184352 | South Africa | Publicly available | Southern Africa | 7  | 6  | 2013 |
| 4 | SRR1184353 | SRR1184353 | South Africa | Publicly available | Southern Africa | 7  | 6  | 2013 |
| 4 | SRR1184354 | SRR1184354 | South Africa | Publicly available | Southern Africa | 25 | 7  | 2013 |
| 4 | SRR1184355 | SRR1184355 | South Africa | Publicly available | Southern Africa | 29 | 5  | 2013 |
| 4 | SRR1184356 | SRR1184356 | South Africa | Publicly available | Southern Africa | 19 | 6  | 2013 |
| 4 | SRR1184359 | SRR1184359 | South Africa | Publicly available | Southern Africa | 14 | 7  | 2013 |
| 4 | SRR1184360 | SRR1184360 | South Africa | Publicly available | Southern Africa | 1  | 8  | 2013 |
| 4 | SRR1184361 | SRR1184361 | South Africa | Publicly available | Southern Africa | 29 | 5  | 2013 |
| 4 | SRR1184362 | SRR1184362 | South Africa | Publicly available | Southern Africa | 15 | 7  | 2013 |
| 4 | SRR1184363 | SRR1184363 | South Africa | Publicly available | Southern Africa | 5  | 6  | 2013 |
| 4 | SRR1184366 | SRR1184366 | South Africa | Publicly available | Southern Africa | 24 | 7  | 2013 |
| 4 | SRR1184367 | SRR1184367 | South Africa | Publicly available | Southern Africa | 23 | 8  | 2013 |
| 4 | SRR1184368 | SRR1184368 | South Africa | Publicly available | Southern Africa | 26 | 7  | 2013 |
| 4 | SRR1184369 | SRR1184369 | South Africa | Publicly available | Southern Africa | 23 | 8  | 2013 |
| 4 | SRR1184371 | SRR1184371 | South Africa | Publicly available | Southern Africa | 12 | 6  | 2013 |
| 4 | SRR1184372 | SRR1184372 | South Africa | Publicly available | Southern Africa | 28 | 6  | 2013 |
| 4 | SRR1184374 | SRR1184374 | South Africa | Publicly available | Southern Africa | 17 | 7  | 2013 |
| 4 | SRR1184375 | SRR1184375 | South Africa | Publicly available | Southern Africa | 12 | 7  | 2013 |
| 4 | SRR1184377 | SRR1184377 | South Africa | Publicly available | Southern Africa | 22 | 7  | 2013 |
| 4 | SRR1184378 | SRR1184378 | South Africa | Publicly available | Southern Africa | 30 | 7  | 2013 |
| 4 | SRR1184381 | SRR1184381 | South Africa | Publicly available | Southern Africa | 22 | 7  | 2013 |
| 4 | SRR1184382 | SRR1184382 | South Africa | Publicly available | Southern Africa | 6  | 8  | 2013 |
| 4 | SRR1184384 | SRR1184384 | South Africa | Publicly available | Southern Africa | 3  | 7  | 2013 |
| 4 | SRR1184385 | SRR1184385 | South Africa | Publicly available | Southern Africa | 3  | 7  | 2013 |
| 4 | SRR1184389 | SRR1184389 | South Africa | Publicly available | Southern Africa | 31 | 5  | 2013 |
| 4 | SRR2101766 | SRR2101766 | South Africa | Publicly available | Southern Africa | 14 | 8  | 2013 |
| 4 | SRR3055711 | SRR3055711 | South Africa | Publicly available | Southern Africa | 1  | 7  | 1996 |
| 4 | SRR3055712 | SRR3055712 | South Africa | Publicly available | Southern Africa | 1  | 7  | 1994 |
| 4 | SRR3055713 | SRR3055713 | South Africa | Publicly available | Southern Africa | 1  | 7  | 2005 |
| 4 | SRR3055714 | SRR3055714 | South Africa | Publicly available | Southern Africa | 1  | 7  | 2005 |
| 4 | SRR3055717 | SRR3055717 | South Africa | Publicly available | Southern Africa | 1  | 7  | 2006 |
| 4 | SRR3055718 | SRR3055718 | South Africa | Publicly available | Southern Africa | 1  | 7  | 2005 |
| 4 | SRR3055719 | SRR3055719 | South Africa | Publicly available | Southern Africa | 1  | 7  | 2005 |
| 4 | SRR6207275 | SRR6207275 | South Africa | Publicly available | Southern Africa | 4  | 9  | 2012 |
| 4 | SRR6207278 | SRR6207278 | South Africa | Publicly available | Southern Africa | 30 | 8  | 2012 |
| 4 | SRR6207280 | SRR6207280 | South Africa | Publicly available | Southern Africa | 14 | 8  | 2012 |
| 4 | SRR6207282 | SRR6207282 | South Africa | Publicly available | Southern Africa | 29 | 6  | 2012 |
| 4 | SRR6207283 | SRR6207283 | South Africa | Publicly available | Southern Africa | 4  | 10 | 2012 |
| 4 | SRR6207287 | SRR6207287 | South Africa | Publicly available | Southern Africa | 11 | 9  | 2012 |
| 4 | SRR6207289 | SRR6207289 | South Africa | Publicly available | Southern Africa | 25 | 9  | 2012 |
| 4 | SRR6207290 | SRR6207290 | South Africa | Publicly available | Southern Africa | 21 | 9  | 2012 |
| 4 | SRR6207292 | SRR6207292 | South Africa | Publicly available | Southern Africa | 24 | 10 | 2012 |
| 4 | SRR832978  | SRR832978  | South Africa | Publicly available | Southern Africa | 19 | 3  | 2008 |
| 4 | SRR832986  | SRR832986  | South Africa | Publicly available | Southern Africa | 12 | 5  | 2008 |
| 4 | SRR832988  | SRR832988  | South Africa | Publicly available | Southern Africa | 27 | 11 | 2009 |
| 4 | SRR832991  | SRR832991  | South Africa | Publicly available | Southern Africa | 1  | 7  | 2008 |
| 4 | SRR832995  | SRR832995  | South Africa | Publicly available | Southern Africa | 25 | 2  | 2010 |
| 4 | SRR832997  | SRR832997  | South Africa | Publicly available | Southern Africa | 21 | 2  | 2008 |
| 4 | SRR833011  | SRR833011  | South Africa | Publicly available | Southern Africa | 17 | 7  | 2008 |

|   |           |           |              |                    |                 |    |    |      |
|---|-----------|-----------|--------------|--------------------|-----------------|----|----|------|
| 4 | SRR833013 | SRR833013 | South Africa | Publicly available | Southern Africa | 3  | 4  | 2008 |
| 4 | SRR833015 | SRR833015 | South Africa | Publicly available | Southern Africa | 23 | 1  | 2008 |
| 4 | SRR833028 | SRR833028 | South Africa | Publicly available | Southern Africa | 1  | 7  | 2008 |
| 4 | SRR833031 | SRR833031 | South Africa | Publicly available | Southern Africa | 9  | 6  | 2008 |
| 4 | SRR833037 | SRR833037 | South Africa | Publicly available | Southern Africa | 15 | 2  | 2008 |
| 4 | SRR833040 | SRR833040 | South Africa | Publicly available | Southern Africa | 28 | 6  | 2010 |
| 4 | SRR833044 | SRR833044 | South Africa | Publicly available | Southern Africa | 7  | 1  | 2010 |
| 4 | SRR833046 | SRR833046 | South Africa | Publicly available | Southern Africa | 11 | 8  | 2009 |
| 4 | SRR833053 | SRR833053 | South Africa | Publicly available | Southern Africa | 22 | 7  | 2008 |
| 4 | SRR833056 | SRR833056 | South Africa | Publicly available | Southern Africa | 13 | 5  | 2008 |
| 4 | SRR833058 | SRR833058 | South Africa | Publicly available | Southern Africa | 8  | 7  | 2010 |
| 4 | SRR833059 | SRR833059 | South Africa | Publicly available | Southern Africa | 25 | 3  | 2010 |
| 4 | SRR833064 | SRR833064 | South Africa | Publicly available | Southern Africa | 5  | 11 | 2010 |
| 4 | SRR833065 | SRR833065 | South Africa | Publicly available | Southern Africa | 14 | 8  | 2008 |
| 4 | SRR833077 | SRR833077 | South Africa | Publicly available | Southern Africa | 7  | 4  | 2010 |
| 4 | SRR833078 | SRR833078 | South Africa | Publicly available | Southern Africa | 29 | 3  | 2010 |
| 4 | SRR833084 | SRR833084 | South Africa | Publicly available | Southern Africa | 4  | 3  | 2010 |
| 4 | SRR833086 | SRR833086 | South Africa | Publicly available | Southern Africa | 1  | 3  | 2010 |
| 4 | SRR833091 | SRR833091 | South Africa | Publicly available | Southern Africa | 12 | 1  | 2010 |
| 4 | SRR833097 | SRR833097 | South Africa | Publicly available | Southern Africa | 3  | 2  | 2010 |
| 4 | SRR833105 | SRR833105 | South Africa | Publicly available | Southern Africa | 6  | 2  | 2008 |
| 4 | SRR833111 | SRR833111 | South Africa | Publicly available | Southern Africa | 8  | 1  | 2008 |
| 4 | SRR833115 | SRR833115 | South Africa | Publicly available | Southern Africa | 23 | 7  | 2010 |
| 4 | SRR833117 | SRR833117 | South Africa | Publicly available | Southern Africa | 30 | 7  | 2008 |
| 4 | SRR833119 | SRR833119 | South Africa | Publicly available | Southern Africa | 14 | 8  | 2008 |
| 4 | SRR833120 | SRR833120 | South Africa | Publicly available | Southern Africa | 14 | 8  | 2008 |
| 4 | SRR833121 | SRR833121 | South Africa | Publicly available | Southern Africa | 1  | 7  | 2008 |
| 4 | SRR833122 | SRR833122 | South Africa | Publicly available | Southern Africa | 25 | 11 | 2009 |
| 4 | SRR833124 | SRR833124 | South Africa | Publicly available | Southern Africa | 18 | 1  | 2010 |
| 4 | SRR833130 | SRR833130 | South Africa | Publicly available | Southern Africa | 31 | 7  | 2008 |
| 4 | SRR833131 | SRR833131 | South Africa | Publicly available | Southern Africa | 26 | 2  | 2008 |
| 4 | SRR833134 | SRR833134 | South Africa | Publicly available | Southern Africa | 13 | 1  | 2010 |
| 4 | SRR833137 | SRR833137 | South Africa | Publicly available | Southern Africa | 26 | 1  | 2009 |
| 4 | SRR833140 | SRR833140 | South Africa | Publicly available | Southern Africa | 15 | 7  | 2008 |
| 4 | SRR833144 | SRR833144 | South Africa | Publicly available | Southern Africa | 19 | 2  | 2008 |
| 4 | SRR833146 | SRR833146 | South Africa | Publicly available | Southern Africa | 20 | 2  | 2008 |
| 4 | SRR833149 | SRR833149 | South Africa | Publicly available | Southern Africa | 16 | 1  | 2008 |
| 4 | SRR833150 | SRR833150 | South Africa | Publicly available | Southern Africa | 12 | 5  | 2008 |
| 4 | SRR833151 | SRR833151 | South Africa | Publicly available | Southern Africa | 30 | 11 | 2009 |
| 4 | SRR833163 | SRR833163 | South Africa | Publicly available | Southern Africa | 25 | 2  | 2008 |
| 4 | SRR833164 | SRR833164 | South Africa | Publicly available | Southern Africa | 19 | 2  | 2008 |
| 4 | SRR833173 | SRR833173 | South Africa | Publicly available | Southern Africa | 25 | 3  | 2010 |
| 4 | SRR833174 | SRR833174 | South Africa | Publicly available | Southern Africa | 13 | 5  | 2008 |
| 4 | SRR833175 | SRR833175 | South Africa | Publicly available | Southern Africa | 2  | 4  | 2008 |
| 4 | SRR833177 | SRR833177 | South Africa | Publicly available | Southern Africa | 26 | 2  | 2010 |
| 4 | SRR833179 | SRR833179 | South Africa | Publicly available | Southern Africa | 6  | 1  | 2010 |
| 4 | SRR833184 | SRR833184 | South Africa | Publicly available | Southern Africa | 23 | 4  | 2009 |
| 4 | SRR833188 | SRR833188 | South Africa | Publicly available | Southern Africa | 21 | 2  | 2008 |
| 4 | SRR833191 | SRR833191 | South Africa | Publicly available | Southern Africa | 25 | 6  | 2010 |
| 4 | SRR833194 | SRR833194 | South Africa | Publicly available | Southern Africa | 21 | 5  | 2009 |
| 4 | SRR833196 | SRR833196 | South Africa | Publicly available | Southern Africa | 23 | 2  | 2010 |
| 4 | SRR847775 | SRR847775 | South Africa | Publicly available | Southern Africa | 25 | 2  | 2011 |
| 4 | SRR847776 | SRR847776 | South Africa | Publicly available | Southern Africa | 9  | 9  | 2011 |
| 4 | SRR847777 | SRR847777 | South Africa | Publicly available | Southern Africa | 22 | 12 | 2011 |
| 4 | SRR847778 | SRR847778 | South Africa | Publicly available | Southern Africa | 21 | 1  | 2011 |
| 4 | SRR847779 | SRR847779 | South Africa | Publicly available | Southern Africa | 9  | 9  | 2011 |
| 4 | SRR847780 | SRR847780 | South Africa | Publicly available | Southern Africa | 17 | 1  | 2012 |
| 4 | SRR847781 | SRR847781 | South Africa | Publicly available | Southern Africa | 14 | 12 | 2011 |
| 4 | SRR847782 | SRR847782 | South Africa | Publicly available | Southern Africa | 22 | 12 | 2011 |
| 4 | SRR847783 | SRR847783 | South Africa | Publicly available | Southern Africa | 14 | 6  | 2011 |
| 4 | SRR847784 | SRR847784 | South Africa | Publicly available | Southern Africa | 22 | 12 | 2011 |

|   |           |           |              |                    |                 |    |    |      |
|---|-----------|-----------|--------------|--------------------|-----------------|----|----|------|
| 4 | SRR847785 | SRR847785 | South Africa | Publicly available | Southern Africa | 24 | 8  | 2011 |
| 4 | SRR847787 | SRR847787 | South Africa | Publicly available | Southern Africa | 15 | 11 | 2010 |
| 4 | SRR847788 | SRR847788 | South Africa | Publicly available | Southern Africa | 4  | 2  | 2011 |
| 4 | SRR847789 | SRR847789 | South Africa | Publicly available | Southern Africa | 9  | 9  | 2011 |
| 4 | SRR847790 | SRR847790 | South Africa | Publicly available | Southern Africa | 15 | 11 | 2010 |
| 4 | SRR847791 | SRR847791 | South Africa | Publicly available | Southern Africa | 14 | 12 | 2011 |
| 4 | SRR847792 | SRR847792 | South Africa | Publicly available | Southern Africa | 4  | 2  | 2011 |
| 4 | SRR847793 | SRR847793 | South Africa | Publicly available | Southern Africa | 9  | 9  | 2011 |
| 4 | SRR847794 | SRR847794 | South Africa | Publicly available | Southern Africa | 21 | 1  | 2011 |
| 4 | SRR847795 | SRR847795 | South Africa | Publicly available | Southern Africa | 22 | 12 | 2011 |
| 4 | SRR847796 | SRR847796 | South Africa | Publicly available | Southern Africa | 23 | 9  | 2010 |
| 4 | SRR847797 | SRR847797 | South Africa | Publicly available | Southern Africa | 28 | 1  | 2011 |
| 4 | SRR847798 | SRR847798 | South Africa | Publicly available | Southern Africa | 27 | 1  | 2012 |
| 4 | SRR847800 | SRR847800 | South Africa | Publicly available | Southern Africa | 5  | 11 | 2010 |
| 4 | SRR847801 | SRR847801 | South Africa | Publicly available | Southern Africa | 24 | 8  | 2011 |
| 4 | SRR847802 | SRR847802 | South Africa | Publicly available | Southern Africa | 14 | 12 | 2011 |
| 4 | SRR847803 | SRR847803 | South Africa | Publicly available | Southern Africa | 15 | 11 | 2010 |
| 4 | SRR924700 | SRR924700 | South Africa | Publicly available | Southern Africa | 1  | 7  | 2008 |
| 4 | SRR924701 | SRR924701 | South Africa | Publicly available | Southern Africa | 1  | 7  | 2008 |
| 4 | SRR924707 | SRR924707 | South Africa | Publicly available | Southern Africa | 1  | 7  | 2008 |
| 4 | SRR958195 | SRR958195 | South Africa | Publicly available | Southern Africa | 21 | 7  | 2009 |
| 4 | SRR958201 | SRR958201 | South Africa | Publicly available | Southern Africa | 10 | 1  | 2008 |
| 4 | SRR958204 | SRR958204 | South Africa | Publicly available | Southern Africa | 23 | 1  | 2008 |
| 4 | SRR958207 | SRR958207 | South Africa | Publicly available | Southern Africa | 4  | 2  | 2008 |
| 4 | SRR958210 | SRR958210 | South Africa | Publicly available | Southern Africa | 3  | 3  | 2008 |
| 4 | SRR958216 | SRR958216 | South Africa | Publicly available | Southern Africa | 6  | 3  | 2008 |
| 4 | SRR958221 | SRR958221 | South Africa | Publicly available | Southern Africa | 3  | 3  | 2008 |
| 4 | SRR958224 | SRR958224 | South Africa | Publicly available | Southern Africa | 4  | 3  | 2008 |
| 4 | SRR958225 | SRR958225 | South Africa | Publicly available | Southern Africa | 20 | 3  | 2008 |

## Additional References

1. Coll F, McNerney R, Guerra-Assunção JA, Glynn JR, Perdigão J, Viveiros M, et al. A robust SNP barcode for typing *Mycobacterium tuberculosis* complex strains. *Nat Commun.* 2014;5.
2. Brynildsrud OB, Pepperell CS, Suffys P, Grandjean L, Monteserin J, Debech N, et al. Global expansion of *Mycobacterium tuberculosis* lineage 4 shaped by colonial migration and local adaptation. *Sci Adv.* 2018;4(10).
3. Somoskovi A, Bruderer V, Hömke R, Bloemberg G V, Böttger EC. A mutation associated with clofazimine and bedaquiline cross-resistance in MDR-TB following bedaquiline treatment. *Eur Respir J.* 2015 Feb 1;45(2):554 LP – 557.
4. Villellas C, Coeck N, Meehan CJ, Lounis N, de Jong B, Rigouts L, et al. Unexpected high prevalence of resistance-associated Rv0678 variants in MDR-TB patients without documented prior use of clofazimine or bedaquiline. *J Antimicrob Chemother.* 2017;72(3):684–90.
5. Yang JS, Kim KJ, Choi H, Lee SH. Delamanid, bedaquiline, and linezolid minimum inhibitory concentration distributions and resistance-related gene mutations in multidrug-resistant and extensively drug-resistant tuberculosis in Korea. *Ann Lab Med.* 2018;38(6):563–8.
6. Andries K, Villellas C, Coeck N, Thys K, Gevers T, Vranckx L, et al. Acquired resistance of *Mycobacterium tuberculosis* to bedaquiline. *PLoS One.* 2014;9(7).
7. Xu J, Wang B, Hu M, Huo F, Guo S, Jing W, et al. Primary Clofazimine and Bedaquiline Resistance among Isolates from Patients with Multidrug-Resistant Tuberculosis. *Antimicrob Agents Chemother.* 2017;61(6):e00239-17.
8. Andres S, Merker M, Heyckendorf J, Kalsdorf B, Rumetshofer R, Indra A, et al. Bedaquiline-resistant Tuberculosis: Dark Clouds on the Horizon. *Am J Respir Crit Care Med.* 2020 Feb;rccm.201909-1819LE.
9. Ghodousi A, Rizvi AH, Baloch AQ, Ghafoor A, Khanzada FM, Qadir M, et al. Acquisition of Cross-Resistance to Bedaquiline and Clofazimine following Treatment for Tuberculosis in Pakistan. *Antimicrob Agents Chemother.* 2019;63(9).



10. Nimmo C, Millard J, Brien K, Moodley S, van Dorp L, Lutchminarain K, et al. Bedaquiline resistance in drug-resistant tuberculosis HIV co-infected patients. *Eur Respir J*. 2020 Feb;55(6).
